# Supplementary material for: Isoform cell-type specificity in the mouse primary motor cortex
Source: Nature. 2021 Oct 6;598(7879):195–9. doi: 10.1038/s41586-021-03969-3 (PMC8494650; doi:10.1038/s41586-021-03969-3)
Supplement: Supplementary file 6 — Cluster-level differential analysis with constant gene [file 41586_2021_3969_MOESM6_ESM.xlsx]

## Sheet: Sheet 1 - ST03_all_clusters_DE
ST03_all_clusters_DE
	index	name	p_raw	p_corr	es	index_name
51798	L2/3 IT Cdh13 Sla	Calm1-202_ENSMUST00000110082	6.51068e-08	0.000347605	0.0681679	L2/3 IT Cdh13 Sla_Calm1
218082	L6b Ror1_2	Oaz1-205_ENSMUST00000179620	1.12483e-06	0.00546443	0.0935022	L6b Ror1_2_Oaz1
200231	L6b Ror1_2	Dnaja1-201_ENSMUST00000030118	1.45449e-06	0.0070659	0.0996181	L6b Ror1_2_Dnaja1
281226	L6b Rprm	Myl6-201_ENSMUST00000164181	1.18573e-07	0.000525989	0.110472	L6b Rprm_Myl6
33734	L2/3 IT Cdh13 Sla	Myl6-201_ENSMUST00000164181	3.799e-07	0.00202828	0.111455	L2/3 IT Cdh13 Sla_Myl6
299290	Lamp5 Slc35d3	Calm1-202_ENSMUST00000110082	1.7565e-07	0.000552946	0.112588	Lamp5 Slc35d3_Calm1
145291	L6b Ror1_1	Mdh2-203_ENSMUST00000138101	1.80511e-08	8.28727e-05	0.120626	L6b Ror1_1_Mdh2
222942	L6b Ror1_2	Vdac2-201_ENSMUST00000022293	1.62995e-07	0.00079183	0.120694	L6b Ror1_2_Vdac2
50796	L2/3 IT Cdh13 Sla	Psma6-201_ENSMUST00000021412	1.74966e-06	0.00934143	0.122754	L2/3 IT Cdh13 Sla_Psma6
52684	L2/3 IT Cdh13 Sla	Ywhaz-201_ENSMUST00000022894	3.0535e-07	0.00163027	0.123185	L2/3 IT Cdh13 Sla_Ywhaz
139169	L6b Ror1_1	Rps6-201_ENSMUST00000102814	5.12287e-07	0.00235191	0.12415	L6b Ror1_1_Rps6
51798	L5 NP Slc17a8	Calm1-202_ENSMUST00000110082	2.69874e-08	9.99075e-05	0.127632	L5 NP Slc17a8_Calm1
132477	L2/3 IT S100a6	Gnas-208_ENSMUST00000109087	1.34354e-06	0.00708449	0.128987	L2/3 IT S100a6_Gnas
208929	L6b Ror1_2	Hnrnpa2b1-204_ENSMUST00000203220	1.9518e-06	0.00948182	0.130843	L6b Ror1_2_Hnrnpa2b1
21980	L2/3 IT Cdh13 Sla	Actb-201_ENSMUST00000100497	8.36152e-08	0.000446421	0.132546	L2/3 IT Cdh13 Sla_Actb
166280	Pvalb Reln	Tma7-201_ENSMUST00000167504	1.10292e-06	0.00289187	0.133637	Pvalb Reln_Tma7
269472	L6b Rprm	Actb-201_ENSMUST00000100497	7.46039e-09	3.30943e-05	0.139963	L6b Rprm_Actb
30635	L2/3 IT Cdh13 Sla	Rplp2-201_ENSMUST00000084434	8.36527e-07	0.00446622	0.143465	L2/3 IT Cdh13 Sla_Rplp2
202516	L6b Ror1_2	Hmgn2-203_ENSMUST00000102553	1.47773e-06	0.00717883	0.145636	L6b Ror1_2_Hmgn2
145726	Pvalb Reln	Actb-201_ENSMUST00000100497	2.54913e-07	0.000668383	0.146927	Pvalb Reln_Actb
355671	L6b Shisa6	Eif1-202_ENSMUST00000132618	7.30623e-07	0.00391249	0.150692	L6b Shisa6_Eif1
144270	L6b Ror1_1	2210016L21Rik-201_ENSMUST00000031538	2.27808e-07	0.00104586	0.150914	L6b Ror1_1_2210016L21Rik
46054	L2/3 IT Cdh13 Sla	Atp5g1-201_ENSMUST00000090541	1.11189e-08	5.9364e-05	0.153295	L2/3 IT Cdh13 Sla_Atp5g1
224496	L6b Ror1_2	Sucla2-203_ENSMUST00000160507	2.15781e-07	0.00104826	0.153646	L6b Ror1_2_Sucla2
196119	L6b Ror1_2	Zcchc18-203_ENSMUST00000113067	6.86188e-07	0.0033335	0.153779	L6b Ror1_2_Zcchc18
83853	L6 CT Grp_1	Actb-201_ENSMUST00000100497	1.34953e-09	5.53305e-06	0.154149	L6 CT Grp_1_Actb
94847	L6 IT Sulf_2	Slc25a3-201_ENSMUST00000076694	3.6992e-07	0.00193283	0.160526	L6 IT Sulf_2_Slc25a3
53889	L2/3 IT Cdh13 Sla	Pmm1-201_ENSMUST00000023112	1.62184e-06	0.00865901	0.160555	L2/3 IT Cdh13 Sla_Pmm1
26699	L6 IT Sulf_1	Psmc4-201_ENSMUST00000032824	1.14681e-06	0.00702881	0.165295	L6 IT Sulf_1_Psmc4
134913	L6b Ror1_1	Sec62-201_ENSMUST00000029256	9.02996e-10	4.14565e-06	0.166737	L6b Ror1_1_Sec62
183086	L6b Ror1_1	Cox7a2l-201_ENSMUST00000025095	2.13575e-06	0.00980522	0.168134	L6b Ror1_1_Cox7a2l
88808	L2/3 IT Macc1	Tbcb-201_ENSMUST00000006254	3.95363e-07	0.00241171	0.168871	L2/3 IT Macc1_Tbcb
85172	Pvalb Gpr149	Cycs-202_ENSMUST00000161401	7.36486e-08	0.000292385	0.177688	Pvalb Gpr149_Cycs
477	Sst C1ql3	Cox5b-204_ENSMUST00000193210	2.38269e-06	0.00816071	0.181136	Sst C1ql3_Cox5b
417540	Sst Myh8_2	Eif1-201_ENSMUST00000049385	3.27423e-06	0.00881094	0.182261	Sst Myh8_2_Eif1
167209	L6b Ror1_1	Sec61g-206_ENSMUST00000166950	1.60598e-06	0.00737304	0.186004	L6b Ror1_1_Sec61g
255354	Sst Etv1	Fkbp1a-201_ENSMUST00000044011	2.31625e-06	0.00753477	0.18691	Sst Etv1_Fkbp1a
270817	L6b Rprm	Snx10-201_ENSMUST00000049152	4.98671e-07	0.00221211	0.194208	L6b Rprm_Snx10
157462	L6b Ror1_1	Nabp2-201_ENSMUST00000026439	8.02593e-07	0.0036847	0.196894	L6b Ror1_1_Nabp2
95132	L2/3 IT Macc1	Nap1l1-205_ENSMUST00000219143	2.11614e-08	0.000129084	0.197305	L2/3 IT Macc1_Nap1l1
45065	L2/3 IT Cdh13 Sla	C1qbp-201_ENSMUST00000078528	1.30267e-06	0.00695494	0.198747	L2/3 IT Cdh13 Sla_C1qbp
44143	Sst C1ql3	Uqcrq-204_ENSMUST00000156503	1.91221e-07	0.000654933	0.198845	Sst C1ql3_Uqcrq
546782	Vip Lmo1	Calm1-202_ENSMUST00000110082	1.1631e-07	0.00019761	0.199961	Vip Lmo1_Calm1
63124	Pvalb Gpr149	Lancl1-203_ENSMUST00000119559	8.99707e-07	0.00357184	0.202379	Pvalb Gpr149_Lancl1
82755	L6 IT Sulf_2	Arpc3-202_ENSMUST00000102525	8.88767e-07	0.00464381	0.203358	L6 IT Sulf_2_Arpc3
84000	L6 IT Sulf_2	Arpc1a-201_ENSMUST00000031625	1.06008e-06	0.00553893	0.203558	L6 IT Sulf_2_Arpc1a
166388	L6b Ror1_1	Ccdc12-201_ENSMUST00000019803	8.76297e-07	0.00402308	0.206841	L6b Ror1_1_Ccdc12
63178	L6 IT Sulf_2	Arpc2-203_ENSMUST00000113820	1.79039e-06	0.0093548	0.206975	L6 IT Sulf_2_Arpc2
114319	L6 IT Sulf_2	Sub1-201_ENSMUST00000022816	1.41381e-06	0.00738717	0.207519	L6 IT Sulf_2_Sub1
73120	Pvalb Gpr149	Ndufb5-203_ENSMUST00000122290	4.50895e-08	0.000179005	0.209123	Pvalb Gpr149_Ndufb5
24133	L6 IT Sulf_1	Rab7-205_ENSMUST00000113600	1.27683e-06	0.0078257	0.209769	L6 IT Sulf_1_Rab7
115151	Pvalb Gpr149	Grina-201_ENSMUST00000023225	9.41632e-07	0.00373828	0.212411	Pvalb Gpr149_Grina
16048	L2/3 IT Cdh13 Sla	Prdx1-204_ENSMUST00000135573	9.83368e-07	0.0052502	0.212419	L2/3 IT Cdh13 Sla_Prdx1
36555	Sst C1ql3	Hsbp1-201_ENSMUST00000034300	6.28729e-08	0.00021534	0.216876	Sst C1ql3_Hsbp1
166189	L6b Ror1_1	Ndufaf3-201_ENSMUST00000074208	9.33556e-07	0.00428595	0.220806	L6b Ror1_1_Ndufaf3
140643	L6 IT Sulf_3	Hmgn2-203_ENSMUST00000102553	1.5819e-06	0.00756463	0.221791	L6 IT Sulf_3_Hmgn2
9200	L2/3 IT Cdh13 Sla	Pqbp1-201_ENSMUST00000033497	9.69102e-08	0.000517404	0.223462	L2/3 IT Cdh13 Sla_Pqbp1
42503	L6b Kcnip1_1	Uqcrc1-201_ENSMUST00000026743	1.54241e-06	0.00825498	0.224074	L6b Kcnip1_1_Uqcrc1
33659	L6b Kcnip1_1	Atp5b-206_ENSMUST00000126751	7.44997e-08	0.000398723	0.224342	L6b Kcnip1_1_Atp5b
348851	Sst Myh8_1	Ubl5-204_ENSMUST00000160682	3.67103e-07	0.00078303	0.224454	Sst Myh8_1_Ubl5
183465	L6 IT Sulf_3	Celf4-202_ENSMUST00000115816	7.17939e-08	0.000343318	0.226768	L6 IT Sulf_3_Celf4
32109	Pvalb Calb1	Sumo3-202_ENSMUST00000099538	1.21534e-06	0.00397902	0.229027	Pvalb Calb1_Sumo3
51082	Pvalb Calb1	Rtn1-203_ENSMUST00000137990	5.9441e-07	0.0019461	0.229886	Pvalb Calb1_Rtn1
69574	L6 CT Grp_1	Pcsk2-201_ENSMUST00000028905	1.40276e-06	0.0057513	0.229995	L6 CT Grp_1_Pcsk2
104760	L6 NP Trh	Rpl14-201_ENSMUST00000165532	2.2485e-06	0.00831047	0.230191	L6 NP Trh_Rpl14
94226	L6b Kcnip1_2	Rps15-202_ENSMUST00000068408	1.61545e-06	0.00887689	0.231798	L6b Kcnip1_2_Rps15
4741	L5 NP Slc17a8	Olfm1-203_ENSMUST00000102879	4.15188e-08	0.000153703	0.232298	L5 NP Slc17a8_Olfm1
154198	Pvalb Reln	Caly-204_ENSMUST00000211283	1.38593e-06	0.0036339	0.233144	Pvalb Reln_Caly
228261	L6b Ror1_2	Ccdc12-201_ENSMUST00000019803	7.50679e-08	0.00036468	0.233301	L6b Ror1_2_Ccdc12
11241	L6b Kcnip1_1	Ndufb5-204_ENSMUST00000127477	1.86643e-06	0.00998914	0.235089	L6b Kcnip1_1_Ndufb5
25097	L6 IT Sulf_1	Cops7a-201_ENSMUST00000032220	7.0572e-07	0.00432536	0.237514	L6 IT Sulf_1_Cops7a
37371	L2/3 IT Cdh13 Sla	Rps24-202_ENSMUST00000169826	7.21192e-08	0.000385044	0.239139	L2/3 IT Cdh13 Sla_Rps24
43817	L6 IT Sulf_1	Mat2b-201_ENSMUST00000040167	8.49247e-07	0.00520504	0.240263	L6 IT Sulf_1_Mat2b
319084	L6b Shisa6	Vma21-202_ENSMUST00000114576	1.07566e-06	0.00576015	0.240285	L6b Shisa6_Vma21
92853	L6 CT Grp_1	Hivep2-204_ENSMUST00000187083	4.48357e-07	0.00183826	0.240494	L6 CT Grp_1_Hivep2
308263	L6b Rprm	Malat1-203_ENSMUST00000173499	2.01249e-06	0.00892741	0.240959	L6b Rprm_Malat1
142675	L2/3 IT S100a6	Lrpap1-201_ENSMUST00000030986	8.67806e-07	0.00457594	0.240976	L2/3 IT S100a6_Lrpap1
92853	L2/3 IT Macc1	Hivep2-204_ENSMUST00000187083	4.0006e-08	0.000244036	0.244896	L2/3 IT Macc1_Hivep2
1893	L6b Kcnip1_1	Ndufa10-201_ENSMUST00000027478	1.70553e-06	0.009128	0.245795	L6b Kcnip1_1_Ndufa10
1938	L2/3 IT Cdh13 Sla	Ppp1r7-201_ENSMUST00000027494	4.61229e-07	0.0024625	0.246452	L2/3 IT Cdh13 Sla_Ppp1r7
187217	Lamp5 Pdlim5	Dock10-206_ENSMUST00000187885	2.53651e-06	0.00534696	0.247969	Lamp5 Pdlim5_Dock10
237959	L6b Ror1_2	Oxct1-201_ENSMUST00000110690	1.93859e-08	9.41769e-05	0.248987	L6b Ror1_2_Oxct1
331063	L6b Shisa6	Actl6b-205_ENSMUST00000139395	6.66984e-08	0.00035717	0.249861	L6b Shisa6_Actl6b
249250	L6b Rprm	Ngef-201_ENSMUST00000027477	2.06284e-06	0.00915077	0.249902	L6b Rprm_Ngef
82320	L6 NP Trh	Iscu-201_ENSMUST00000026937	1.64672e-06	0.00608629	0.250266	L6 NP Trh_Iscu
58503	L6 IT Sulf_1	Csnk2b-208_ENSMUST00000174306	1.00311e-06	0.00614805	0.253277	L6 IT Sulf_1_Csnk2b
180197	L6 CT Grp_2	Cd47-201_ENSMUST00000084838	1.33197e-06	0.00635348	0.253605	L6 CT Grp_2_Cd47
11686	L2/3 IT Cdh13 Sla	Pfn2-201_ENSMUST00000066882	9.50567e-08	0.000507508	0.255073	L2/3 IT Cdh13 Sla_Pfn2
608655	Vip Serpinf1	Calm1-202_ENSMUST00000110082	5.99377e-15	1.56737e-11	0.255168	Vip Serpinf1_Calm1
213401	L6b Ror1_2	Car11-201_ENSMUST00000003360	1.01257e-06	0.00491905	0.256069	L6b Ror1_2_Car11
241	L6 IT Sulf_1	Eloc-208_ENSMUST00000188641	1.3796e-06	0.00845557	0.256904	L6 IT Sulf_1_Eloc
94987	L6 CT Grp_1	Atp2b1-207_ENSMUST00000219557	1.32604e-07	0.000543676	0.259791	L6 CT Grp_1_Atp2b1
29565	Sst C1ql3	Uqcrc2-201_ENSMUST00000033176	1.59669e-06	0.00546867	0.260845	Sst C1ql3_Uqcrc2
455773	Vip Igfbp6	Ndufa5-201_ENSMUST00000023851	1.52235e-06	0.00169742	0.262189	Vip Igfbp6_Ndufa5
3585	L6 CT Gpr139	Srp9-201_ENSMUST00000027792	1.19453e-06	0.00666071	0.262288	L6 CT Gpr139_Srp9
30638	L2/3 IT Cdh13 Sla	Rplp2-203_ENSMUST00000106004	1.93674e-08	0.000103402	0.263495	L2/3 IT Cdh13 Sla_Rplp2
91340	L6 IT Sulf_2	Arl6ip1-201_ENSMUST00000032888	7.9542e-07	0.00415607	0.266133	L6 IT Sulf_2_Arl6ip1
198866	L6b Ror1_2	Celsr2-201_ENSMUST00000090558	2.47142e-07	0.00120062	0.268556	L6b Ror1_2_Celsr2
140079	L2/3 IT S100a6	Hpcal4-201_ENSMUST00000059667	1.1273e-11	5.94423e-08	0.269487	L2/3 IT S100a6_Hpcal4
74594	L6 IT Sulf_2	Ensa-202_ENSMUST00000058230	7.63593e-08	0.000398977	0.270241	L6 IT Sulf_2_Ensa
61216	L6 IT Sulf_1	Zfand5-201_ENSMUST00000025659	3.11553e-07	0.00190951	0.271097	L6 IT Sulf_1_Zfand5
279467	L6b Rprm	Specc1l-207_ENSMUST00000219430	7.11738e-09	3.15727e-05	0.271192	L6b Rprm_Specc1l
248555	L6b Rprm	Carf-210_ENSMUST00000191232	9.98678e-07	0.00443014	0.271244	L6b Rprm_Carf
362545	L6b Shisa6	Ly6h-204_ENSMUST00000127095	5.65751e-08	0.00030296	0.274547	L6b Shisa6_Ly6h
460029	Vip Igfbp6	Zfp260-207_ENSMUST00000182136	4.06883e-06	0.00453675	0.275162	Vip Igfbp6_Zfp260
100750	Pvalb Gpr149	Sucla2-203_ENSMUST00000160507	5.38683e-07	0.00213857	0.275516	Pvalb Gpr149_Sucla2
226417	L6b Ror1_2	Nptn-212_ENSMUST00000177292	4.75614e-09	2.31053e-05	0.276251	L6b Ror1_2_Nptn
193481	Vip Chat_3	Fkbp1a-201_ENSMUST00000044011	3.07583e-06	0.00378942	0.276443	Vip Chat_3_Fkbp1a
59719	L2/3 IT Cdh13 Sla	Celf4-202_ENSMUST00000115816	2.41898e-07	0.00129149	0.276504	L2/3 IT Cdh13 Sla_Celf4
331581	L6b Shisa6	Polr1d-202_ENSMUST00000110557	1.75187e-06	0.00938125	0.277299	L6b Shisa6_Polr1d
204009	L6b Ror1_2	Actr3b-202_ENSMUST00000128727	1.44582e-07	0.00070238	0.2784	L6b Ror1_2_Actr3b
85214	L2/3 IT Macc1	Tax1bp1-201_ENSMUST00000080723	1.26229e-06	0.00769995	0.279128	L2/3 IT Macc1_Tax1bp1
156393	L6 CT Grp_2	Aes-201_ENSMUST00000002518	9.92956e-07	0.0047364	0.279994	L6 CT Grp_2_Aes
145372	L6b Ror1_1	Fis1-202_ENSMUST00000111094	9.42802e-07	0.0043284	0.280124	L6b Ror1_1_Fis1
16148	L2/3 IT Cdh13 Sla	Atp6v0b-206_ENSMUST00000147845	1.59933e-07	0.000853882	0.280667	L2/3 IT Cdh13 Sla_Atp6v0b
310592	L6b Shisa6	Unc80-201_ENSMUST00000061620	5.09436e-09	2.72803e-05	0.281042	L6b Shisa6_Unc80
74858	L6 NP Trh	Bcas2-201_ENSMUST00000005830	6.0178e-07	0.00222418	0.282512	L6 NP Trh_Bcas2
117008	L6 CT Grp_1	Mkl2-204_ENSMUST00000149359	3.24556e-09	1.33068e-05	0.283578	L6 CT Grp_1_Mkl2
578121	Vip Serpinf1	Ran-201_ENSMUST00000031383	2.0922e-06	0.00547111	0.283705	Vip Serpinf1_Ran
82397	L6 NP Trh	2210016L21Rik-201_ENSMUST00000031538	2.2552e-06	0.00833523	0.285721	L6 NP Trh_2210016L21Rik
53691	Sst C1ql3	Tomm22-201_ENSMUST00000023062	1.1273e-06	0.00386102	0.28602	Sst C1ql3_Tomm22
115055	L6 NP Trh	Ly6h-201_ENSMUST00000023241	2.22672e-06	0.00822994	0.287717	L6 NP Trh_Ly6h
99746	L2/3 IT Macc1	Cnih1-202_ENSMUST00000146629	2.04692e-07	0.00124862	0.288082	L2/3 IT Macc1_Cnih1
48053	Pvalb Calb1	Nrsn1-201_ENSMUST00000057866	1.95136e-06	0.00638877	0.289394	Pvalb Calb1_Nrsn1
89669	Lamp5 Egln3_2	Rpl18-201_ENSMUST00000072503	3.11631e-06	0.00746355	0.292339	Lamp5 Egln3_2_Rpl18
127174	L6b Ror1_1	Cox20-201_ENSMUST00000027781	7.04035e-07	0.00323223	0.292496	L6b Ror1_1_Cox20
143821	L6b Ror1_1	Lrrc8d-205_ENSMUST00000135776	1.00214e-06	0.00460082	0.292584	L6b Ror1_1_Lrrc8d
31479	L6 IT Sulf_1	1700021F05Rik-202_ENSMUST00000147196	4.12614e-07	0.00252891	0.294329	L6 IT Sulf_1_1700021F05Rik
139374	L6b Ror1_1	Sgip1-212_ENSMUST00000142430	4.14054e-07	0.00190092	0.295099	L6b Ror1_1_Sgip1
280606	L6b Rprm	Atp2b1-207_ENSMUST00000219557	2.65925e-08	0.000117964	0.295158	L6b Rprm_Atp2b1
345308	L6b Shisa6	Cx3cl1-201_ENSMUST00000034230	5.85286e-07	0.00313421	0.295761	L6b Shisa6_Cx3cl1
87731	L6 NP Trh	Syt5-201_ENSMUST00000065957	2.00724e-06	0.00741875	0.297809	L6 NP Trh_Syt5
299665	L6b Rprm	Klc1-203_ENSMUST00000120544	9.28542e-07	0.00411901	0.300367	L6b Rprm_Klc1
55031	L6 IT Sulf_1	Grin2a-206_ENSMUST00000199708	8.00981e-07	0.00490922	0.301272	L6 IT Sulf_1_Grin2a
143239	L6b Ror1_1	Gabrb1-201_ENSMUST00000031122	6.11087e-09	2.8055e-05	0.302255	L6b Ror1_1_Gabrb1
78186	L2/3 IT Macc1	Ppt1-201_ENSMUST00000030412	1.93586e-07	0.00118088	0.302621	L2/3 IT Macc1_Ppt1
52836	L2/3 IT Cdh13 Sla	Eny2-204_ENSMUST00000226827	7.70987e-07	0.0041163	0.303761	L2/3 IT Cdh13 Sla_Eny2
237649	L6b Ror1_2	Meg3-205_ENSMUST00000129245	7.98834e-08	0.000388074	0.304453	L6b Ror1_2_Meg3
88100	L6 IT Sulf_2	Calm3-204_ENSMUST00000173557	1.42485e-06	0.00744485	0.304956	L6 IT Sulf_2_Calm3
370289	L6b Shisa6	Nrxn2-202_ENSMUST00000113458	5.96355e-07	0.00319348	0.30497	L6b Shisa6_Nrxn2
302627	L6b Rprm	Mkl2-204_ENSMUST00000149359	2.1242e-12	9.42296e-09	0.305391	L6b Rprm_Mkl2
26225	L5 NP Slc17a8	Calm3-201_ENSMUST00000019514	2.38379e-08	8.82478e-05	0.307359	L5 NP Slc17a8_Calm3
350173	L6b Shisa6	Nptn-209_ENSMUST00000177020	3.52493e-07	0.0018876	0.307367	L6b Shisa6_Nptn
248959	Lamp5 Slc35d3	Resp18-201_ENSMUST00000039534	7.27425e-07	0.00228994	0.308724	Lamp5 Slc35d3_Resp18
57197	Pvalb Calb1	Mpc1-203_ENSMUST00000130559	7.95376e-10	2.60406e-06	0.312111	Pvalb Calb1_Mpc1
25300	Pvalb Calb1	Smim10l1-201_ENSMUST00000100864	6.60751e-07	0.0021633	0.312529	Pvalb Calb1_Smim10l1
575302	Vip Serpinf1	Dnajb6-203_ENSMUST00000114839	9.58493e-07	0.00250646	0.312565	Vip Serpinf1_Dnajb6
302073	L6b Rprm	Tfcp2-205_ENSMUST00000230039	1.55172e-06	0.00688342	0.31342	L6b Rprm_Tfcp2
349022	L6b Shisa6	Tmem205-201_ENSMUST00000046831	8.50393e-08	0.000455385	0.315315	L6b Shisa6_Tmem205
188308	L6b Ror1_2	1700025G04Rik-201_ENSMUST00000044581	6.4803e-07	0.00314813	0.315316	L6b Ror1_2_1700025G04Rik
43552	L2/3 IT Cdh13 Sla	Commd1-204_ENSMUST00000159081	1.1501e-09	6.14036e-06	0.315898	L2/3 IT Cdh13 Sla_Commd1
225447	L6b Ror1_2	Aplp2-203_ENSMUST00000213254	1.64492e-06	0.00799104	0.316488	L6b Ror1_2_Aplp2
89956	L6 CT Grp_1	Klf13-201_ENSMUST00000063694	4.90026e-08	0.000200911	0.316603	L6 CT Grp_1_Klf13
27818	L2/3 IT Cdh13 Sla	Cyth2-204_ENSMUST00000210137	4.80762e-09	2.56679e-05	0.317149	L2/3 IT Cdh13 Sla_Cyth2
228667	L6b Ror1_2	1110059G10Rik-201_ENSMUST00000035154	1.11373e-06	0.0054105	0.317258	L6b Ror1_2_1110059G10Rik
242620	L6 CT Nxph2_1	Ttc3-230_ENSMUST00000231569	3.27444e-08	0.000131665	0.321162	L6 CT Nxph2_1_Ttc3
272533	L6b Rprm	Eno2-201_ENSMUST00000004378	3.76334e-07	0.00166942	0.322691	L6b Rprm_Eno2
359879	L6b Shisa6	Gpr22-201_ENSMUST00000057783	5.21838e-07	0.00279444	0.32452	L6b Shisa6_Gpr22
92325	Sst Chodl	Caly-204_ENSMUST00000211283	4.51287e-07	0.00148609	0.325518	Sst Chodl_Caly
240610	L6b Ror1_2	Rbfox1-205_ENSMUST00000230658	1.66044e-06	0.00806641	0.326336	L6b Ror1_2_Rbfox1
177686	L6b Ror1_1	Sept3-201_ENSMUST00000023095	5.14158e-09	2.3605e-05	0.326608	L6b Ror1_1_Sept3
101912	L2/3 IT Macc1	Sorl1-201_ENSMUST00000060989	5.36394e-08	0.0003272	0.327288	L2/3 IT Macc1_Sorl1
120619	L2/3 IT Macc1	Enpp5-201_ENSMUST00000024756	1.28724e-06	0.00785216	0.329743	L2/3 IT Macc1_Enpp5
477995	Vip Igfbp6	Gabarap-202_ENSMUST00000108592	4.81499e-06	0.00536871	0.330898	Vip Igfbp6_Gabarap
604	L6b Kcnip1_1	Rpl31-202_ENSMUST00000178079	1.00811e-06	0.00539539	0.330898	L6b Kcnip1_1_Rpl31
331804	L6b Shisa6	Ppp1r9a-201_ENSMUST00000035813	2.82054e-07	0.0015104	0.331569	L6b Shisa6_Ppp1r9a
117768	L6 CT Grp_1	Fgf12-205_ENSMUST00000232352	3.46074e-07	0.0014189	0.331897	L6 CT Grp_1_Fgf12
27782	L6 IT Sulf_1	Car11-201_ENSMUST00000003360	5.13312e-07	0.00314609	0.331901	L6 IT Sulf_1_Car11
262385	L6b Rprm	Clta-203_ENSMUST00000107847	1.94134e-06	0.00861178	0.332871	L6b Rprm_Clta
139374	L2/3 IT S100a6	Sgip1-212_ENSMUST00000142430	8.31256e-11	4.38322e-07	0.334509	L2/3 IT S100a6_Sgip1
210815	Sst Crhr2_2	Ndufa9-203_ENSMUST00000205002	7.61664e-07	0.00254396	0.334965	Sst Crhr2_2_Ndufa9
192751	Sst Crhr2_2	Pdia3-201_ENSMUST00000028683	2.74441e-06	0.00916634	0.335385	Sst Crhr2_2_Pdia3
121918	L2/3 IT Macc1	Ap3s1-202_ENSMUST00000224622	2.75732e-07	0.00168196	0.336835	L2/3 IT Macc1_Ap3s1
62766	L2/3 IT Macc1	Satb2-202_ENSMUST00000114415	1.39178e-06	0.00848986	0.337105	L2/3 IT Macc1_Satb2
15844	L6 IT Sulf_1	Btf3l4-204_ENSMUST00000102742	1.258e-08	7.71027e-05	0.338325	L6 IT Sulf_1_Btf3l4
43553	L2/3 IT Cdh13 Sla	Commd1-202_ENSMUST00000071068	9.29777e-07	0.00496408	0.338894	L2/3 IT Cdh13 Sla_Commd1
337401	L6b Shisa6	Gabrb3-201_ENSMUST00000039697	1.77938e-08	9.52859e-05	0.34214	L6b Shisa6_Gabrb3
41185	L6 IT Sulf_1	Fam81a-201_ENSMUST00000034749	5.98477e-07	0.00366807	0.342437	L6 IT Sulf_1_Fam81a
119495	Sncg Slc17a8	Ndufb10-201_ENSMUST00000045602	4.5944e-07	0.00247317	0.342466	Sncg Slc17a8_Ndufb10
10066	Pvalb Calb1	Maged1-201_ENSMUST00000026142	4.16248e-07	0.0013628	0.342516	Pvalb Calb1_Maged1
121914	L2/3 IT Macc1	Eif1a-202_ENSMUST00000168382	4.70821e-07	0.00287201	0.342897	L2/3 IT Macc1_Eif1a
189885	Sst Crhr2_2	Gad2-201_ENSMUST00000028123	1.97373e-06	0.00659227	0.344854	Sst Crhr2_2_Gad2
53693	Sst C1ql3	Tomm22-202_ENSMUST00000127292	1.98127e-06	0.00678583	0.345318	Sst C1ql3_Tomm22
18929	L6 IT Sulf_1	Lrpap1-201_ENSMUST00000030986	1.07318e-07	0.00065775	0.346236	L6 IT Sulf_1_Lrpap1
217548	Pvalb Th	Ube2d1-201_ENSMUST00000020085	2.3978e-06	0.00722697	0.347149	Pvalb Th_Ube2d1
248650	L6b Rprm	Klf7-202_ENSMUST00000114086	1.05396e-06	0.00467535	0.350252	L6b Rprm_Klf7
178737	L6b Ror1_1	Rbfox1-205_ENSMUST00000230658	2.00095e-07	0.000918638	0.350982	L6b Ror1_1_Rbfox1
92967	L6 NP Trh	Ahi1-201_ENSMUST00000105525	2.60847e-06	0.0096409	0.351322	L6 NP Trh_Ahi1
38416	L6b Kcnip1_1	Sdr39u1-201_ENSMUST00000111325	5.47731e-07	0.00293146	0.352358	L6b Kcnip1_1_Sdr39u1
283137	Sst Etv1	Prdx2-205_ENSMUST00000127215	1.03489e-07	0.000336649	0.352521	Sst Etv1_Prdx2
359061	Vip Gpc3	Map1b-201_ENSMUST00000064762	5.40775e-06	0.00913368	0.352584	Vip Gpc3_Map1b
235825	L6b Ror1_2	Klhl29-201_ENSMUST00000020958	1.90443e-06	0.00925174	0.353996	L6b Ror1_2_Klhl29
5408	L6 IT Sulf_1	Strbp-201_ENSMUST00000028279	2.52321e-07	0.00154648	0.354439	L6 IT Sulf_1_Strbp
9435	L6 IT Sulf_1	Ube2a-201_ENSMUST00000016452	4.03344e-07	0.00247209	0.3564	L6 IT Sulf_1_Ube2a
311602	L6b Shisa6	R3hdm1-207_ENSMUST00000187605	1.80196e-06	0.00964948	0.356886	L6b Shisa6_R3hdm1
32647	L6 CT Gpr139	Aes-201_ENSMUST00000002518	2.24499e-07	0.00125181	0.356955	L6 CT Gpr139_Aes
14092	L6b Kcnip1_1	Rabggtb-201_ENSMUST00000089950	1.01189e-06	0.00541565	0.358028	L6b Kcnip1_1_Rabggtb
25873	Sst C1ql3	Hspbp1-201_ENSMUST00000079970	3.18739e-07	0.00109168	0.358947	Sst C1ql3_Hspbp1
33877	L6b Kcnip1_1	Pet100-203_ENSMUST00000207389	1.20376e-06	0.00644253	0.36036	L6b Kcnip1_1_Pet100
7666	Pvalb Calb1	Esf1-201_ENSMUST00000046030	1.37363e-06	0.00449726	0.360887	Pvalb Calb1_Esf1
37774	Pvalb Calb1	Ghitm-203_ENSMUST00000223921	2.35558e-07	0.000771215	0.361256	Pvalb Calb1_Ghitm
277945	L6b Rprm	Caly-202_ENSMUST00000166758	7.6436e-07	0.0033907	0.361283	L6b Rprm_Caly
10971	L5 NP Slc17a8	Stmn2-201_ENSMUST00000029002	2.42324e-06	0.00897084	0.362772	L5 NP Slc17a8_Stmn2
54491	Pvalb Calb1	Faim2-201_ENSMUST00000023750	6.33152e-07	0.00207294	0.363823	Pvalb Calb1_Faim2
160790	Sst Crhr2_1	Synpr-201_ENSMUST00000070323	2.65064e-06	0.00943627	0.363916	Sst Crhr2_1_Synpr
171235	L6b Ror1_1	Anapc11-201_ENSMUST00000026128	6.34067e-10	2.911e-06	0.364117	L6b Ror1_1_Anapc11
143227	L2/3 IT S100a6	Gabra2-203_ENSMUST00000197284	1.02997e-06	0.00543106	0.365524	L2/3 IT S100a6_Gabra2
322637	L6b Shisa6	Wdr47-201_ENSMUST00000051145	1.46765e-06	0.00785929	0.367645	L6b Shisa6_Wdr47
72888	L2/3 IT Macc1	Ralyl-206_ENSMUST00000193117	1.24607e-07	0.000760102	0.367925	L2/3 IT Macc1_Ralyl
117767	Pvalb Gpr149	Fgf12-206_ENSMUST00000232632	2.25436e-06	0.0089498	0.369133	Pvalb Gpr149_Fgf12
3588	L6 IT Sulf_1	Degs1-201_ENSMUST00000035295	1.37248e-06	0.00841191	0.369233	L6 IT Sulf_1_Degs1
48732	L2/3 IT Cdh13 Sla	Spock1-202_ENSMUST00000185502	6.0119e-07	0.00320976	0.369972	L2/3 IT Cdh13 Sla_Spock1
22439	L6 IT Sulf_1	Ppp1r9a-201_ENSMUST00000035813	2.94046e-08	0.000180221	0.370456	L6 IT Sulf_1_Ppp1r9a
159990	L2/3 IT S100a6	Psmb10-201_ENSMUST00000034369	3.42962e-07	0.00180844	0.370741	L2/3 IT S100a6_Psmb10
175031	L6b Ror1_1	Srsf5-201_ENSMUST00000094693	7.10068e-07	0.00325992	0.370762	L6b Ror1_1_Srsf5
596368	Vip Serpinf1	Eif3g-201_ENSMUST00000004206	3.28173e-06	0.00858171	0.371302	Vip Serpinf1_Eif3g
130248	L2/3 IT S100a6	Mapk8ip1-201_ENSMUST00000050312	9.93016e-08	0.000523618	0.372526	L2/3 IT S100a6_Mapk8ip1
139331	L2/3 IT S100a6	Jak1-201_ENSMUST00000102781	2.19762e-09	1.1588e-05	0.373927	L2/3 IT S100a6_Jak1
60220	Sst C1ql3	Sec11c-201_ENSMUST00000025394	8.0815e-07	0.00276791	0.376518	Sst C1ql3_Sec11c
21373	L6b Kcnip1_1	Caln1-201_ENSMUST00000086029	1.23336e-06	0.00660094	0.376908	L6b Kcnip1_1_Caln1
272844	L6b Rprm	Fam234b-201_ENSMUST00000111915	5.15825e-07	0.0022882	0.377338	L6b Rprm_Fam234b
77058	L6 IT Sulf_2	Gng10-201_ENSMUST00000041160	1.40126e-08	7.32156e-05	0.377497	L6 IT Sulf_2_Gng10
939	L6 IT Sulf_1	Bzw1-201_ENSMUST00000050552	3.77331e-07	0.00231266	0.378852	L6 IT Sulf_1_Bzw1
16934	Vip C1ql1	Sh3bgrl3-201_ENSMUST00000030651	2.94444e-06	0.00587121	0.379559	Vip C1ql1_Sh3bgrl3
249430	Lamp5 Slc35d3	Ppp1r7-201_ENSMUST00000027494	1.63828e-06	0.0051573	0.379869	Lamp5 Slc35d3_Ppp1r7
43831	L6b Kcnip1_1	Gabrg2-202_ENSMUST00000070735	5.49104e-07	0.0029388	0.380721	L6b Kcnip1_1_Gabrg2
284474	Lamp5 Slc35d3	Pdhb-201_ENSMUST00000022268	2.67223e-06	0.00841218	0.380815	Lamp5 Slc35d3_Pdhb
107814	L6 IT Sulf_2	Nme2-201_ENSMUST00000021217	2.8606e-07	0.00149466	0.381381	L6 IT Sulf_2_Nme2
427865	Sst Myh8_2	Cadm2-201_ENSMUST00000114292	1.99214e-08	5.36084e-05	0.381945	Sst Myh8_2_Cadm2
31094	Vip C1ql1	Ahi1-201_ENSMUST00000105525	1.24235e-07	0.000247725	0.382328	Vip C1ql1_Ahi1
11543	Sst C1ql3	Ndufc1-201_ENSMUST00000038108	1.36519e-08	4.67578e-05	0.383193	Sst C1ql3_Ndufc1
8000	L6 IT Sulf_1	Necab3-201_ENSMUST00000000895	6.79657e-07	0.00416562	0.387117	L6 IT Sulf_1_Necab3
112354	Pvalb Gpr149	Acp1-202_ENSMUST00000074038	1.9236e-07	0.00076367	0.387277	Pvalb Gpr149_Acp1
170026	L2/3 IT S100a6	Igfbp4-201_ENSMUST00000017637	1.80206e-06	0.00950224	0.387421	L2/3 IT S100a6_Igfbp4
326985	Vip Gpc3	Acot7-202_ENSMUST00000075363	1.18007e-06	0.00199313	0.388199	Vip Gpc3_Acot7
286418	Vip Crispld2	Serp2-201_ENSMUST00000064517	2.63791e-06	0.00418109	0.388693	Vip Crispld2_Serp2
223343	L6b Ror1_2	Mapk8-205_ENSMUST00000111945	7.62008e-08	0.000370183	0.389604	L6b Ror1_2_Mapk8
365099	L6b Shisa6	Fam131a-201_ENSMUST00000056518	5.42609e-07	0.00290567	0.389688	L6b Shisa6_Fam131a
1707	Vip C1ql1	Ncl-202_ENSMUST00000185676	3.21265e-06	0.00640603	0.390171	Vip C1ql1_Ncl
312312	L6b Shisa6	Prdx6-202_ENSMUST00000071718	1.19085e-08	6.37701e-05	0.391158	L6b Shisa6_Prdx6
317011	L6b Shisa6	Snap25-202_ENSMUST00000110098	1.72888e-20	9.25817e-17	0.391423	L6b Shisa6_Snap25
207066	L6b Ror1_2	Rfc2-204_ENSMUST00000201464	4.4974e-08	0.000218484	0.391648	L6b Ror1_2_Rfc2
239420	L6 CT Nxph2_1	St13-205_ENSMUST00000172107	1.4811e-06	0.0059555	0.39208	L6 CT Nxph2_1_St13
29335	L6 IT Sulf_1	Eif4g2-213_ENSMUST00000162415	7.6775e-07	0.00470554	0.395825	L6 IT Sulf_1_Eif4g2
11687	Vip C1ql1	Pfn2-202_ENSMUST00000119344	4.90174e-06	0.00977408	0.396219	Vip C1ql1_Pfn2
18903	Vip C1ql1	Grk4-202_ENSMUST00000074651	2.14762e-06	0.00428236	0.396321	Vip C1ql1_Grk4
139374	L6 IT Sulf_3	Sgip1-212_ENSMUST00000142430	1.54554e-10	7.39079e-07	0.397171	L6 IT Sulf_3_Sgip1
31449	Lamp5 Egln3_1	Snx3-201_ENSMUST00000019939	3.40031e-06	0.00680402	0.397666	Lamp5 Egln3_1_Snx3
55005	Pvalb Calb1	Abat-201_ENSMUST00000065987	9.046e-07	0.00296166	0.398427	Pvalb Calb1_Abat
47241	Pvalb Calb1	Srsf2-201_ENSMUST00000092404	2.02269e-08	6.6223e-05	0.401849	Pvalb Calb1_Srsf2
557984	Vip Serpinf1	Eef1b2-204_ENSMUST00000129339	1.91988e-06	0.00502049	0.405912	Vip Serpinf1_Eef1b2
193749	L6b Ror1_2	Ergic3-201_ENSMUST00000006035	4.94982e-07	0.00240462	0.406004	L6b Ror1_2_Ergic3
617274	Vip Serpinf1	Atp5a1-201_ENSMUST00000026495	5.22657e-07	0.00136675	0.406552	Vip Serpinf1_Atp5a1
598625	Vip Serpinf1	Rnf7-201_ENSMUST00000057500	1.67344e-06	0.00437604	0.406937	Vip Serpinf1_Rnf7
97457	L6 IT Sulf_2	Nfix-204_ENSMUST00000109764	8.42493e-09	4.40203e-05	0.407097	L6 IT Sulf_2_Nfix
193536	L6b Ror1_2	H13-202_ENSMUST00000089059	1.10208e-06	0.00535389	0.408639	L6b Ror1_2_H13
48875	L2/3 IT Cdh13 Sla	Dapk1-201_ENSMUST00000044083	2.81489e-07	0.00150287	0.409909	L2/3 IT Cdh13 Sla_Dapk1
128484	L6b Ror1_1	Olfm1-205_ENSMUST00000152415	5.60704e-17	2.57419e-13	0.410343	L6b Ror1_1_Olfm1
47920	L6 IT Sulf_1	Yae1d1-204_ENSMUST00000222796	7.96472e-07	0.00488158	0.41122	L6 IT Sulf_1_Yae1d1
592877	Vip Serpinf1	Ndrg4-203_ENSMUST00000080666	4.38205e-07	0.00114591	0.411407	Vip Serpinf1_Ndrg4
216629	L6 CT Nxph2_1	Abracl-201_ENSMUST00000020002	3.44999e-07	0.00138724	0.411474	L6 CT Nxph2_1_Abracl
105263	Lamp5 Egln3_2	Ppia-203_ENSMUST00000135789	1.80626e-07	0.0004326	0.413845	Lamp5 Egln3_2_Ppia
11686	Lamp5 Egln3_1	Pfn2-201_ENSMUST00000066882	1.43754e-06	0.00287652	0.415502	Lamp5 Egln3_1_Pfn2
23310	Lamp5 Egln3_1	Hnrnpa2b1-204_ENSMUST00000203220	1.48068e-06	0.00296285	0.415574	Lamp5 Egln3_1_Hnrnpa2b1
354417	L6b Shisa6	Rpain-201_ENSMUST00000018593	9.6101e-07	0.00514621	0.416123	L6b Shisa6_Rpain
275876	L6b Rprm	Unc45a-209_ENSMUST00000206032	4.31913e-13	1.91597e-09	0.416549	L6b Rprm_Unc45a
198872	Sst Crhr2_2	Sars-201_ENSMUST00000090553	1.74299e-06	0.00582158	0.418993	Sst Crhr2_2_Sars
231969	Sst Crhr2_2	Dnajc7-201_ENSMUST00000014339	2.96403e-07	0.000989987	0.419537	Sst Crhr2_2_Dnajc7
293541	Lamp5 Slc35d3	Snf8-204_ENSMUST00000150946	5.12415e-07	0.00161308	0.421922	Lamp5 Slc35d3_Snf8
307481	L6b Rprm	Arhgap26-201_ENSMUST00000097593	4.30252e-07	0.0019086	0.422507	L6b Rprm_Arhgap26
285720	Lamp5 Slc35d3	Slc22a17-201_ENSMUST00000050772	4.17156e-07	0.00131321	0.422526	Lamp5 Slc35d3_Slc22a17
218192	Sst Crhr2_2	Mrpl54-201_ENSMUST00000046114	2.851e-06	0.00952235	0.425095	Sst Crhr2_2_Mrpl54
466845	Vip Igfbp6	Myl6-201_ENSMUST00000164181	1.68875e-08	1.88296e-05	0.425358	Vip Igfbp6_Myl6
20380	L2/3 IT Cdh13 Sla	Miat-201_ENSMUST00000181535	4.29975e-07	0.00229564	0.425659	L2/3 IT Cdh13 Sla_Miat
342586	L6b Shisa6	Syt1-202_ENSMUST00000105276	1.46775e-06	0.00785981	0.425707	L6b Shisa6_Syt1
564884	Vip Serpinf1	Eif2s2-201_ENSMUST00000099173	6.53644e-07	0.00170928	0.425914	Vip Serpinf1_Eif2s2
337749	L6b Shisa6	Unc45a-209_ENSMUST00000206032	2.56878e-10	1.37558e-06	0.426055	L6b Shisa6_Unc45a
82412	Pvalb Gpr149	Cabp1-204_ENSMUST00000112113	4.76383e-07	0.00189124	0.427239	Pvalb Gpr149_Cabp1
216922	L6 CT Nxph2_1	Tspyl4-202_ENSMUST00000213791	7.36887e-07	0.00296302	0.428176	L6 CT Nxph2_1_Tspyl4
68996	Pvalb Gpr149	Ckmt1-201_ENSMUST00000000317	7.85886e-07	0.00311997	0.430783	Pvalb Gpr149_Ckmt1
328637	L6b Shisa6	Arap2-201_ENSMUST00000076623	1.05042e-08	5.62498e-05	0.431994	L6b Shisa6_Arap2
588150	Vip Serpinf1	Rwdd1-201_ENSMUST00000019917	1.52673e-06	0.0039924	0.431998	Vip Serpinf1_Rwdd1
605550	Vip Serpinf1	Tmed9-201_ENSMUST00000109905	1.843e-06	0.00481943	0.432423	Vip Serpinf1_Tmed9
288830	Sst Etv1	Myo5a-201_ENSMUST00000123128	1.06072e-06	0.00345052	0.432942	Sst Etv1_Myo5a
300530	Lamp5 Slc35d3	Efr3a-201_ENSMUST00000015146	2.50334e-07	0.000788053	0.433685	Lamp5 Slc35d3_Efr3a
414220	Vip Htr1f	Higd1a-206_ENSMUST00000215300	6.12122e-06	0.00918183	0.433729	Vip Htr1f_Higd1a
46048	Sst C1ql3	Snf8-201_ENSMUST00000006217	1.59815e-08	5.47365e-05	0.433924	Sst C1ql3_Snf8
453186	Vip Igfbp6	Lrrc8d-205_ENSMUST00000135776	7.61413e-06	0.00848975	0.434468	Vip Igfbp6_Lrrc8d
286043	L6b Rprm	Amer2-201_ENSMUST00000022561	1.93038e-08	8.56315e-05	0.436001	L6b Rprm_Amer2
69261	L6 IT Sulf_2	Nop56-202_ENSMUST00000103198	1.44531e-06	0.00755173	0.437044	L6 IT Sulf_2_Nop56
234465	Sst Crhr2_2	Isca1-201_ENSMUST00000057115	4.2566e-07	0.0014217	0.43784	Sst Crhr2_2_Isca1
47489	Sst C1ql3	Anapc11-201_ENSMUST00000026128	1.52423e-06	0.00522049	0.438917	Sst C1ql3_Anapc11
288576	L6b Rprm	Herc1-201_ENSMUST00000042824	1.00464e-09	4.45658e-06	0.439693	L6b Rprm_Herc1
59968	Pvalb Calb1	Rnf14-201_ENSMUST00000072376	1.15922e-07	0.000379528	0.44031	Pvalb Calb1_Rnf14
95523	Lamp5 Egln3_2	Ptges3-201_ENSMUST00000052798	7.85203e-08	0.000188056	0.442361	Lamp5 Egln3_2_Ptges3
300457	Vip Crispld2	Tatdn1-205_ENSMUST00000226835	1.90169e-07	0.000301418	0.442783	Vip Crispld2_Tatdn1
574336	Vip Serpinf1	Kif1b-203_ENSMUST00000060537	1.5991e-06	0.00418165	0.442852	Vip Serpinf1_Kif1b
2232	L6 IT Sulf_1	R3hdm1-201_ENSMUST00000036288	4.56348e-07	0.00279696	0.444303	L6 IT Sulf_1_R3hdm1
143821	L6 IT Sulf_3	Lrrc8d-205_ENSMUST00000135776	8.09759e-10	3.87227e-06	0.444948	L6 IT Sulf_3_Lrrc8d
601693	Vip Serpinf1	Tmem256-201_ENSMUST00000094065	6.79137e-08	0.000177594	0.445586	Vip Serpinf1_Tmem256
595454	Vip Serpinf1	Ctsb-202_ENSMUST00000225540	7.63482e-07	0.0019965	0.445676	Vip Serpinf1_Ctsb
54	L6 IT Sulf_1	Pcmtd1-201_ENSMUST00000061280	5.96395e-08	0.00036553	0.446533	L6 IT Sulf_1_Pcmtd1
246179	Sst Crhr2_2	Ndufv1-201_ENSMUST00000042497	1.96916e-06	0.00657699	0.446735	Sst Crhr2_2_Ndufv1
95097	L2/3 IT Macc1	Syt1-206_ENSMUST00000156979	1.01402e-06	0.00618554	0.449112	L2/3 IT Macc1_Syt1
282972	Vip Crispld2	Tecr-201_ENSMUST00000019382	1.18703e-07	0.000188145	0.44974	Vip Crispld2_Tecr
72608	L6 NP Trh	Nbdy-204_ENSMUST00000185492	6.86439e-07	0.00253708	0.452693	L6 NP Trh_Nbdy
250394	L6b Rprm	Rabgap1l-202_ENSMUST00000028052	5.50788e-08	0.00024433	0.452924	L6b Rprm_Rabgap1l
88989	Pvalb Gpr149	Scn1b-202_ENSMUST00000211923	1.0352e-06	0.00410973	0.454219	Pvalb Gpr149_Scn1b
206166	L6 CT Nxph2_1	Pop5-202_ENSMUST00000128830	2.37538e-07	0.00095514	0.455186	L6 CT Nxph2_1_Pop5
262501	Lamp5 Slc35d3	Gabbr2-201_ENSMUST00000107749	9.98379e-07	0.0031429	0.455891	Lamp5 Slc35d3_Gabbr2
48363	L6 IT Sulf_1	Atxn1-201_ENSMUST00000091628	1.57763e-06	0.00966928	0.456211	L6 IT Sulf_1_Atxn1
574660	Vip Serpinf1	Ssu72-201_ENSMUST00000030905	4.36917e-07	0.00114254	0.456856	Vip Serpinf1_Ssu72
38328	L2/3 IT Cdh13 Sla	Psme2-208_ENSMUST00000161807	3.51975e-07	0.00187919	0.456878	L2/3 IT Cdh13 Sla_Psme2
78965	L2/3 IT Macc1	Luzp1-204_ENSMUST00000129230	8.93771e-07	0.005452	0.457235	L2/3 IT Macc1_Luzp1
97207	Pvalb Gpr149	Tmem38a-201_ENSMUST00000034244	1.39167e-06	0.00552493	0.459455	Pvalb Gpr149_Tmem38a
40039	L6 IT Sulf_1	Sorl1-201_ENSMUST00000060989	6.86645e-07	0.00420845	0.460977	L6 IT Sulf_1_Sorl1
221709	L6 CT Nxph2_1	Dync1li2-201_ENSMUST00000041769	9.26625e-08	0.000372596	0.461291	L6 CT Nxph2_1_Dync1li2
64357	L6b Kcnip1_2	Arl8a-201_ENSMUST00000027684	1.49027e-06	0.00818903	0.461418	L6b Kcnip1_2_Arl8a
16333	L6 CT Gpr139	Hpcal4-201_ENSMUST00000059667	6.16705e-08	0.000343875	0.461623	L6 CT Gpr139_Hpcal4
51690	L6 IT Sulf_1	Nrxn3-205_ENSMUST00000163134	1.42409e-06	0.00872823	0.461909	L6 IT Sulf_1_Nrxn3
302485	L6b Rprm	Rbfox1-201_ENSMUST00000056416	5.613e-08	0.000248993	0.463249	L6b Rprm_Rbfox1
376396	Sst Myh8_2	Dpm2-201_ENSMUST00000028151	3.00701e-06	0.00809187	0.465411	Sst Myh8_2_Dpm2
56347	L6 CT Gpr139	Atp6v1a-202_ENSMUST00000114666	3.25207e-07	0.00181336	0.465682	L6 CT Gpr139_Atp6v1a
1615	L2/3 IT Cdh13 Sla	Mff-209_ENSMUST00000160972	7.30313e-10	3.89914e-06	0.466375	L2/3 IT Cdh13 Sla_Mff
6901	Sst C1ql3	1700020I14Rik-202_ENSMUST00000153581	1.43859e-06	0.00492716	0.466803	Sst C1ql3_1700020I14Rik
195402	L6b Ror1_2	L1cam-203_ENSMUST00000114430	9.98296e-07	0.00484972	0.4669	L6b Ror1_2_L1cam
579001	Vip Serpinf1	Bud31-207_ENSMUST00000162594	1.3755e-06	0.00359694	0.46723	Vip Serpinf1_Bud31
35584	Lamp5 Egln3_1	Nfix-204_ENSMUST00000109764	3.54113e-06	0.0070858	0.468375	Lamp5 Egln3_1_Nfix
89020	Sst Chodl	Gpi1-207_ENSMUST00000205870	1.78474e-06	0.00587714	0.470912	Sst Chodl_Gpi1
70579	L6 CT Grp_1	Pmepa1-201_ENSMUST00000036248	1.59677e-06	0.00654674	0.470991	L6 CT Grp_1_Pmepa1
39428	L6 IT Sulf_1	Chordc1-208_ENSMUST00000217031	5.89608e-07	0.00361371	0.471217	L6 IT Sulf_1_Chordc1
171205	L6b Ror1_1	Arl16-208_ENSMUST00000143233	8.74107e-07	0.00401303	0.472303	L6b Ror1_1_Arl16
79710	Lamp5 Egln3_2	Aurkaip1-203_ENSMUST00000105592	1.03202e-07	0.000247169	0.47322	Lamp5 Egln3_2_Aurkaip1
49414	L6b Kcnip1_1	Mef2c-212_ENSMUST00000197146	1.13604e-06	0.00608011	0.473522	L6b Kcnip1_1_Mef2c
58742	Pvalb Calb1	Rcan2-201_ENSMUST00000044792	4.28733e-08	0.000140367	0.473643	Pvalb Calb1_Rcan2
158264	Sst Crhr2_1	Tusc3-203_ENSMUST00000209440	1.97134e-06	0.00701796	0.475529	Sst Crhr2_1_Tusc3
592337	Vip Serpinf1	Tecr-201_ENSMUST00000019382	2.78959e-07	0.000729477	0.47639	Vip Serpinf1_Tecr
69936	Pvalb Gpr149	Ggt7-201_ENSMUST00000029131	1.64901e-07	0.000654656	0.480288	Pvalb Gpr149_Ggt7
307483	L6b Rprm	Arhgap26-204_ENSMUST00000123820	1.52073e-06	0.00674595	0.482078	L6b Rprm_Arhgap26
61109	L6b Kcnip1_1	Syt7-202_ENSMUST00000076968	5.25637e-07	0.00281321	0.482598	L6b Kcnip1_1_Syt7
312313	L6b Shisa6	Prdx6-208_ENSMUST00000192639	9.45386e-07	0.00506254	0.483215	L6b Shisa6_Prdx6
63000	Lamp5 Egln3_2	Eef1b2-204_ENSMUST00000129339	1.04678e-09	2.50703e-06	0.484624	Lamp5 Egln3_2_Eef1b2
602559	Vip Serpinf1	Znhit3-201_ENSMUST00000103195	8.95209e-07	0.00234097	0.485099	Vip Serpinf1_Znhit3
229009	Vip Chat_3	Ppia-203_ENSMUST00000135789	4.42264e-10	5.44869e-07	0.486293	Vip Chat_3_Ppia
22535	Pvalb Calb1	Tmem106b-201_ENSMUST00000031556	7.51473e-08	0.000246032	0.48644	Pvalb Calb1_Tmem106b
322343	L6b Shisa6	Nras-201_ENSMUST00000029445	3.81575e-10	2.04333e-06	0.487022	L6b Shisa6_Nras
28178	Pvalb Calb1	Mef2a-208_ENSMUST00000156690	2.5535e-06	0.00836016	0.488094	Pvalb Calb1_Mef2a
40541	Lamp5 Egln3_1	Elmod1-201_ENSMUST00000048409	1.59829e-06	0.00319818	0.488334	Lamp5 Egln3_1_Elmod1
116904	L6 CT Grp_1	Grin2a-206_ENSMUST00000199708	3.69845e-07	0.00151637	0.489096	L6 CT Grp_1_Grin2a
361055	Vip Gpc3	Nrxn3-205_ENSMUST00000163134	1.24413e-06	0.00210134	0.489342	Vip Gpc3_Nrxn3
337491	Vip Gpc3	Tm2d3-201_ENSMUST00000032726	1.64387e-06	0.0027765	0.491392	Vip Gpc3_Tm2d3
281249	L6 CT Nxph2_2	Rpl41-206_ENSMUST00000177163	2.59363e-06	0.0077731	0.492288	L6 CT Nxph2_2_Rpl41
26953	L6b Kcnip1_1	Alkbh6-201_ENSMUST00000060834	5.25484e-07	0.00281239	0.492827	L6b Kcnip1_1_Alkbh6
140079	L6 CT Grp_2	Hpcal4-201_ENSMUST00000059667	5.12429e-07	0.00244429	0.493387	L6 CT Grp_2_Hpcal4
135432	L6 CT Grp_2	Pfn2-201_ENSMUST00000066882	2.09102e-06	0.00997418	0.494633	L6 CT Grp_2_Pfn2
107533	L2/3 IT Macc1	Dusp14-205_ENSMUST00000164891	6.78154e-07	0.00413674	0.495681	L2/3 IT Macc1_Dusp14
100859	L6 NP Trh	Pcdh17-201_ENSMUST00000071370	8.30252e-07	0.00306861	0.496113	L6 NP Trh_Pcdh17
161717	L6b Ror1_1	Slc35f4-201_ENSMUST00000074368	7.10686e-07	0.00326276	0.496321	L6b Ror1_1_Slc35f4
431458	Vip Htr1f	Sec11c-201_ENSMUST00000025394	2.3643e-06	0.00354645	0.496682	Vip Htr1f_Sec11c
8732	Vip C1ql1	Gnas-206_ENSMUST00000109084	2.5935e-07	0.000517143	0.496822	Vip C1ql1_Gnas
580072	Vip Serpinf1	Atp6v0e2-201_ENSMUST00000040361	9.72406e-07	0.00254284	0.497431	Vip Serpinf1_Atp6v0e2
615355	Vip Serpinf1	Csnk2b-201_ENSMUST00000025246	1.03682e-06	0.00271129	0.498143	Vip Serpinf1_Csnk2b
159988	L2/3 IT S100a6	Psmb10-203_ENSMUST00000212332	1.89464e-06	0.00999043	0.498507	L2/3 IT S100a6_Psmb10
85988	Pvalb Gpr149	Copg1-202_ENSMUST00000113607	5.08556e-07	0.00201897	0.499158	Pvalb Gpr149_Copg1
169964	L6 CT Grp_2	Ppp1r1b-202_ENSMUST00000132443	1.08266e-06	0.00516431	0.499212	L6 CT Grp_2_Ppp1r1b
3016	L6 IT Sulf_1	Kifap3-202_ENSMUST00000077642	4.49783e-08	0.000275672	0.500206	L6 IT Sulf_1_Kifap3
35934	L6b Kcnip1_1	Arl2bp-201_ENSMUST00000034228	1.70844e-06	0.00914355	0.500345	L6b Kcnip1_1_Arl2bp
197568	Pvalb Th	Glrb-201_ENSMUST00000029654	1.72493e-06	0.00519892	0.500639	Pvalb Th_Glrb
33037	L2/3 IT Cdh13 Sla	Metap2-210_ENSMUST00000181217	4.11263e-07	0.00219573	0.502429	L2/3 IT Cdh13 Sla_Metap2
61039	Sst C1ql3	Nxf1-202_ENSMUST00000010248	3.32442e-07	0.00113861	0.502603	Sst C1ql3_Nxf1
311799	L6b Shisa6	Adora1-202_ENSMUST00000086465	1.76613e-06	0.00945762	0.50301	L6b Shisa6_Adora1
223590	L6b Ror1_2	Slc35f4-201_ENSMUST00000074368	7.20858e-07	0.00350193	0.503605	L6b Ror1_2_Slc35f4
496289	Vip Lmo1	Arpc2-203_ENSMUST00000113820	2.86919e-06	0.00487476	0.504119	Vip Lmo1_Arpc2
320493	L6b Shisa6	Tnik-201_ENSMUST00000159236	3.46055e-08	0.000185313	0.504238	L6b Shisa6_Tnik
131243	L6 IT Sulf_3	1700037H04Rik-202_ENSMUST00000103188	1.28709e-06	0.00615488	0.50523	L6 IT Sulf_3_1700037H04Rik
277943	L6b Rprm	Caly-203_ENSMUST00000211044	9.61715e-12	4.26617e-08	0.505727	L6b Rprm_Caly
20610	Sst C1ql3	Cit-201_ENSMUST00000051704	1.40972e-06	0.0048283	0.508455	Sst C1ql3_Cit
306211	L6b Rprm	Gabbr1-209_ENSMUST00000174456	2.36458e-07	0.00104893	0.508795	L6b Rprm_Gabbr1
2358	L6 IT Sulf_1	Nfasc-202_ENSMUST00000094569	1.39908e-07	0.000857494	0.510062	L6 IT Sulf_1_Nfasc
880	L6 IT Sulf_1	Mob4-202_ENSMUST00000159311	9.52951e-07	0.00584064	0.511309	L6 IT Sulf_1_Mob4
8745	L6 CT Gpr139	Prelid3b-201_ENSMUST00000016401	1.64258e-06	0.00915901	0.512261	L6 CT Gpr139_Prelid3b
48732	L6 IT Sulf_1	Spock1-202_ENSMUST00000185502	1.0111e-06	0.00619706	0.512267	L6 IT Sulf_1_Spock1
174201	L6 CT Grp_2	Myt1l-202_ENSMUST00000049784	2.76597e-09	1.31937e-05	0.513063	L6 CT Grp_2_Myt1l
440259	Vip Igfbp6	Hypk-201_ENSMUST00000028677	3.22628e-07	0.000359731	0.513939	Vip Igfbp6_Hypk
48557	L6 CT Gpr139	Nop16-201_ENSMUST00000026987	2.16268e-07	0.00120591	0.514516	L6 CT Gpr139_Nop16
35584	Vip C1ql1	Nfix-204_ENSMUST00000109764	3.60419e-06	0.00718675	0.515146	Vip C1ql1_Nfix
116021	L2/3 IT Macc1	Mapk11-201_ENSMUST00000088823	3.21692e-09	1.96232e-05	0.5159	L2/3 IT Macc1_Mapk11
87028	Sst Chodl	Gapdh-202_ENSMUST00000117757	6.31687e-07	0.00208015	0.51628	Sst Chodl_Gapdh
22285	Sst C1ql3	Hmgb1-201_ENSMUST00000085546	1.71932e-08	5.88866e-05	0.5164	Sst C1ql3_Hmgb1
558319	Vip Serpinf1	Ptprn-201_ENSMUST00000027404	2.74308e-06	0.00717317	0.518183	Vip Serpinf1_Ptprn
20856	L6 IT Sulf_1	Tctn1-201_ENSMUST00000111738	2.7927e-10	1.71165e-06	0.518221	L6 IT Sulf_1_Tctn1
299832	Lamp5 Slc35d3	Oxct1-201_ENSMUST00000110690	4.58983e-08	0.000144488	0.518384	Lamp5 Slc35d3_Oxct1
132254	L2/3 IT S100a6	Cdh22-201_ENSMUST00000065438	1.05727e-06	0.00557499	0.518718	L2/3 IT S100a6_Cdh22
99176	L2/3 IT Macc1	Adk-207_ENSMUST00000224069	9.40911e-07	0.00573956	0.518884	L2/3 IT Macc1_Adk
245372	L6b Ror1_2	Bin1-201_ENSMUST00000025239	1.17351e-06	0.00570091	0.519425	L6b Ror1_2_Bin1
80898	Vip Chat_1	Nsg1-201_ENSMUST00000031009	1.99686e-08	4.10755e-05	0.519906	Vip Chat_1_Nsg1
24220	Sst C1ql3	Chchd6-201_ENSMUST00000032172	2.76465e-08	9.46892e-05	0.520123	Sst C1ql3_Chchd6
8609	L6 IT Sulf_1	Kcnb1-204_ENSMUST00000207917	1.08496e-08	6.64971e-05	0.520292	L6 IT Sulf_1_Kcnb1
590507	Vip Serpinf1	Ptges3-201_ENSMUST00000052798	1.26136e-08	3.29847e-05	0.521012	Vip Serpinf1_Ptges3
197150	Lamp5 Pdlim5	Noct-202_ENSMUST00000144826	1.77132e-07	0.000373394	0.522005	Lamp5 Pdlim5_Noct
593206	Vip Serpinf1	Psmd7-201_ENSMUST00000044106	1.11688e-06	0.00292065	0.524544	Vip Serpinf1_Psmd7
350696	L6b Shisa6	Arpp19-201_ENSMUST00000007800	5.3354e-07	0.00285711	0.526526	L6b Shisa6_Arpp19
217293	Sst Crhr2_2	Psap-205_ENSMUST00000179238	1.33197e-06	0.00444878	0.527549	Sst Crhr2_2_Psap
119070	Vip Chat_1	Mpc1-203_ENSMUST00000130559	1.73339e-06	0.00356559	0.52765	Vip Chat_1_Mpc1
25083	Sst C1ql3	Ptms-201_ENSMUST00000032216	2.52657e-07	0.00086535	0.528911	Sst C1ql3_Ptms
196594	L6b Ror1_2	Hey1-201_ENSMUST00000042412	1.39913e-06	0.00679699	0.529008	L6b Ror1_2_Hey1
311791	L6b Shisa6	Atp2b4-207_ENSMUST00000165602	1.34251e-08	7.18914e-05	0.530238	L6b Shisa6_Atp2b4
45432	L6 CT Gpr139	Sdf2-201_ENSMUST00000002133	7.94215e-07	0.00442854	0.531089	L6 CT Gpr139_Sdf2
608034	Vip Serpinf1	Churc1-201_ENSMUST00000041262	2.83667e-06	0.0074179	0.531625	Vip Serpinf1_Churc1
20128	L6 IT Sulf_1	A830010M20Rik-203_ENSMUST00000100951	8.70729e-08	0.00053367	0.531812	L6 IT Sulf_1_A830010M20Rik
105743	Pvalb Gpr149	Ttc1-201_ENSMUST00000048578	2.06656e-06	0.00820423	0.532312	Pvalb Gpr149_Ttc1
248937	Lamp5 Slc35d3	Tuba4a-201_ENSMUST00000079464	1.28861e-06	0.00405654	0.532499	Lamp5 Slc35d3_Tuba4a
21379	L6b Kcnip1_1	Caln1-203_ENSMUST00000111288	4.87939e-13	2.61145e-09	0.53431	L6b Kcnip1_1_Caln1
338742	L6b Shisa6	Btbd10-201_ENSMUST00000047091	1.18217e-07	0.000633053	0.535059	L6b Shisa6_Btbd10
193265	Lamp5 Pdlim5	Snap25-202_ENSMUST00000110098	1.03398e-07	0.000217962	0.535573	Lamp5 Pdlim5_Snap25
603575	Vip Serpinf1	Nsf-202_ENSMUST00000103075	1.4227e-06	0.00372037	0.536689	Vip Serpinf1_Nsf
205788	Sst Crhr2_2	Fam69a-201_ENSMUST00000031198	1.64323e-06	0.0054884	0.539244	Sst Crhr2_2_Fam69a
108764	Pvalb Gpr149	Psmd12-202_ENSMUST00000106750	1.25709e-06	0.00499066	0.53997	Pvalb Gpr149_Psmd12
284932	Sst Etv1	Appl1-201_ENSMUST00000036570	1.61203e-06	0.00524392	0.541786	Sst Etv1_Appl1
599300	Vip Serpinf1	Ndufaf3-201_ENSMUST00000074208	6.2817e-07	0.00164266	0.542103	Vip Serpinf1_Ndufaf3
20860	L6 IT Sulf_1	Pptc7-201_ENSMUST00000053426	2.58383e-07	0.00158363	0.543689	L6 IT Sulf_1_Pptc7
296052	Lamp5 Slc35d3	Cltb-202_ENSMUST00000091609	2.65626e-06	0.00836189	0.54417	Lamp5 Slc35d3_Cltb
201001	Sst Crhr2_2	Psip1-202_ENSMUST00000107214	4.34419e-07	0.00145096	0.544485	Sst Crhr2_2_Psip1
272873	Lamp5 Slc35d3	H2afj-201_ENSMUST00000074556	1.19185e-07	0.000375194	0.544696	Lamp5 Slc35d3_H2afj
215795	Vip Chat_3	Inpp5f-208_ENSMUST00000151237	6.15552e-06	0.0075836	0.545081	Vip Chat_3_Inpp5f
59753	Pvalb Calb1	Bin1-201_ENSMUST00000025239	1.34373e-06	0.00439938	0.545253	Pvalb Calb1_Bin1
36902	L6 IT Sulf_1	Ntpcr-201_ENSMUST00000034313	1.07922e-08	6.61455e-05	0.546864	L6 IT Sulf_1_Ntpcr
101698	Pvalb Gpr149	Aplp2-202_ENSMUST00000079758	2.78535e-08	0.000110578	0.547329	Pvalb Gpr149_Aplp2
364370	L6b Shisa6	Abat-201_ENSMUST00000065987	7.46249e-07	0.00399616	0.547487	L6b Shisa6_Abat
323890	L6b Shisa6	Srsf12-201_ENSMUST00000067864	3.0371e-07	0.00162637	0.547708	L6b Shisa6_Srsf12
299057	Lamp5 Slc35d3	Acyp1-201_ENSMUST00000008966	1.78151e-06	0.00560819	0.54907	Lamp5 Slc35d3_Acyp1
379089	Sst Myh8_2	Gm14149-201_ENSMUST00000123048	3.36598e-06	0.00905785	0.550723	Sst Myh8_2_Gm14149
58067	Sst C1ql3	BC004004-203_ENSMUST00000149405	9.24818e-07	0.0031675	0.551074	Sst C1ql3_BC004004
102220	L6 IT Sulf_2	Cadm1-201_ENSMUST00000034581	1.00757e-06	0.00526458	0.551673	L6 IT Sulf_2_Cadm1
214529	Sst Crhr2_2	Mrpl48-202_ENSMUST00000107053	1.4686e-06	0.00490512	0.552536	Sst Crhr2_2_Mrpl48
345086	L6b Shisa6	Neto2-201_ENSMUST00000109686	1.03666e-06	0.00555131	0.553248	L6b Shisa6_Neto2
118001	L2/3 IT Macc1	Kalrn-206_ENSMUST00000114954	8.2797e-11	5.05062e-07	0.554339	L2/3 IT Macc1_Kalrn
75600	Pvalb Gpr149	Ube2d3-201_ENSMUST00000106291	1.05348e-07	0.000418233	0.556371	Pvalb Gpr149_Ube2d3
75704	L2/3 IT Macc1	Rap1gds1-201_ENSMUST00000029796	2.5262e-08	0.000154098	0.556793	L2/3 IT Macc1_Rap1gds1
56627	Vip C1ql1	Cadm2-201_ENSMUST00000114292	6.78014e-08	0.000135196	0.556848	Vip C1ql1_Cadm2
5178	L6 CT Gpr139	Ak1-202_ENSMUST00000113277	8.37699e-09	4.67101e-05	0.556954	L6 CT Gpr139_Ak1
29772	Pvalb Calb1	Eif3c-202_ENSMUST00000180459	2.1826e-08	7.14584e-05	0.557398	Pvalb Calb1_Eif3c
20923	L6 IT Sulf_1	Camkk2-201_ENSMUST00000111668	2.08961e-07	0.00128072	0.557993	L6 IT Sulf_1_Camkk2
90159	Pvalb Gpr149	Mrps11-205_ENSMUST00000133553	2.38369e-07	0.000946324	0.558515	Pvalb Gpr149_Mrps11
126357	L6b Ror1_1	Rgs2-202_ENSMUST00000127206	6.15466e-07	0.00282561	0.558588	L6b Ror1_1_Rgs2
304199	L6b Rprm	Atp5j-204_ENSMUST00000127651	9.42716e-10	4.18189e-06	0.561626	L6b Rprm_Atp5j
46176	Sst C1ql3	B230217C12Rik-201_ENSMUST00000054783	1.88333e-06	0.00645039	0.561932	Sst C1ql3_B230217C12Rik
608547	Vip Serpinf1	Nrxn3-205_ENSMUST00000163134	7.12205e-11	1.86242e-07	0.562175	Vip Serpinf1_Nrxn3
297640	Lamp5 Slc35d3	Ncoa1-201_ENSMUST00000085814	1.69826e-06	0.00534613	0.562797	Lamp5 Slc35d3_Ncoa1
560086	Vip Serpinf1	Ufc1-201_ENSMUST00000080001	2.67355e-06	0.00699134	0.563314	Vip Serpinf1_Ufc1
114669	L6b Kcnip1_2	Oxr1-204_ENSMUST00000110297	2.95314e-07	0.00162275	0.563374	L6b Kcnip1_2_Oxr1
93791	Sncg Slc17a8	Phyhipl-201_ENSMUST00000046513	1.9334e-08	0.000104075	0.564145	Sncg Slc17a8_Phyhipl
23285	Pvalb Calb1	Gsdme-202_ENSMUST00000101405	3.1215e-12	1.02198e-08	0.564979	Pvalb Calb1_Gsdme
101912	L6 IT Sulf_2	Sorl1-201_ENSMUST00000060989	1.11063e-08	5.80305e-05	0.565051	L6 IT Sulf_2_Sorl1
359382	L6b Shisa6	Emb-201_ENSMUST00000022242	1.76912e-06	0.00947361	0.565856	L6b Shisa6_Emb
248936	Lamp5 Slc35d3	Tuba4a-202_ENSMUST00000186213	3.06988e-07	0.000966399	0.566083	Lamp5 Slc35d3_Tuba4a
175949	L2/3 IT S100a6	Inf2-203_ENSMUST00000222275	2.30396e-08	0.000121488	0.5684	L2/3 IT S100a6_Inf2
14408	L6 IT Sulf_1	Wwp1-202_ENSMUST00000108246	1.04485e-06	0.00640388	0.568406	L6 IT Sulf_1_Wwp1
184758	Sst Crhr2_1	Wdr74-201_ENSMUST00000049424	2.31334e-06	0.00823547	0.568544	Sst Crhr2_1_Wdr74
173658	Sst Crhr2_1	Rab3c-201_ENSMUST00000167824	9.62754e-08	0.00034274	0.569551	Sst Crhr2_1_Rab3c
296932	Vip Crispld2	Ccnh-201_ENSMUST00000022030	2.59694e-06	0.00411614	0.569769	Vip Crispld2_Ccnh
299658	Sst Etv1	Apopt1-201_ENSMUST00000040519	1.82603e-06	0.00594008	0.570188	Sst Etv1_Apopt1
102947	L6 NP Trh	Ppib-201_ENSMUST00000034947	6.1662e-07	0.00227903	0.570563	L6 NP Trh_Ppib
358128	L6b Shisa6	Hnrnpk-213_ENSMUST00000176797	2.91749e-07	0.00156232	0.571115	L6b Shisa6_Hnrnpk
146407	L6b Ror1_1	Ndufa5-202_ENSMUST00000118558	1.64358e-14	7.54568e-11	0.57223	L6b Ror1_1_Ndufa5
33734	Vip C1ql1	Myl6-201_ENSMUST00000164181	1.39071e-13	2.77307e-10	0.572266	Vip C1ql1_Myl6
1462	Vip C1ql1	Ptprn-201_ENSMUST00000027404	4.23311e-06	0.00844082	0.572318	Vip C1ql1_Ptprn
184379	L2/3 IT S100a6	Syt12-201_ENSMUST00000059295	1.27444e-06	0.00672014	0.573224	L2/3 IT S100a6_Syt12
173522	L2/3 IT S100a6	Pik3r1-201_ENSMUST00000035532	4.76259e-08	0.000251131	0.573231	L2/3 IT S100a6_Pik3r1
13493	Vip C1ql1	Fnbp1l-201_ENSMUST00000162409	1.74275e-06	0.00347503	0.573276	Vip C1ql1_Fnbp1l
411051	Sst Myh8_2	Ntm-209_ENSMUST00000151977	8.56056e-08	0.000230365	0.57384	Sst Myh8_2_Ntm
280724	Lamp5 Slc35d3	Nav3-202_ENSMUST00000160159	7.41383e-07	0.00233387	0.573918	Lamp5 Slc35d3_Nav3
176907	L6b Ror1_1	Ly6e-213_ENSMUST00000191127	7.62753e-13	3.5018e-09	0.573945	L6b Ror1_1_Ly6e
95611	Lamp5 Egln3_2	Myl6-206_ENSMUST00000218127	4.59639e-07	0.00110084	0.574466	Lamp5 Egln3_2_Myl6
361397	L6b Shisa6	Meg3-201_ENSMUST00000124106	4.24444e-08	0.00022729	0.576887	L6b Shisa6_Meg3
53147	L6 CT Gpr139	Lynx1-201_ENSMUST00000023259	6.34505e-07	0.003538	0.577123	L6 CT Gpr139_Lynx1
12786	Pvalb Calb1	Anp32e-202_ENSMUST00000165307	2.67189e-06	0.00874777	0.577289	Pvalb Calb1_Anp32e
133403	L2/3 IT S100a6	C230004F18Rik-206_ENSMUST00000231449	8.66769e-10	4.57047e-06	0.577768	L2/3 IT S100a6_C230004F18Rik
192520	Sst Crhr2_2	1700020I14Rik-202_ENSMUST00000153581	1.35482e-08	4.52509e-05	0.578532	Sst Crhr2_2_1700020I14Rik
9235	L6 IT Sulf_1	Rbm3-203_ENSMUST00000115616	3.06799e-07	0.00188037	0.579334	L6 IT Sulf_1_Rbm3
38076	L6 CT Gpr139	Hnrnpc-201_ENSMUST00000111610	8.53558e-08	0.000475944	0.579683	L6 CT Gpr139_Hnrnpc
566923	Vip Serpinf1	Maged1-201_ENSMUST00000026142	2.95941e-06	0.00773886	0.581098	Vip Serpinf1_Maged1
38806	Pvalb Calb1	Lgi3-203_ENSMUST00000226548	4.3456e-08	0.000142275	0.581866	Pvalb Calb1_Lgi3
201542	L6b Ror1_2	Bend5-201_ENSMUST00000030274	4.35527e-07	0.00211579	0.582078	L6b Ror1_2_Bend5
68920	Pvalb Gpr149	Ccndbp1-201_ENSMUST00000060455	2.49832e-07	0.000991832	0.582802	Pvalb Gpr149_Ccndbp1
307639	Lamp5 Slc35d3	Csnk1a1-204_ENSMUST00000165123	6.23583e-07	0.00196304	0.583316	Lamp5 Slc35d3_Csnk1a1
88678	L6 CT Grp_1	Actn4-201_ENSMUST00000068045	5.06799e-07	0.00207788	0.586918	L6 CT Grp_1_Actn4
19407	Vip C1ql1	Uchl1-202_ENSMUST00000176015	1.13093e-06	0.00225508	0.589621	Vip C1ql1_Uchl1
111855	Sncg Slc17a8	Ndufs4-204_ENSMUST00000225707	1.73377e-07	0.000933288	0.590048	Sncg Slc17a8_Ndufs4
97103	Pvalb Gpr149	Mvb12a-201_ENSMUST00000034272	3.24246e-07	0.00128726	0.590556	Pvalb Gpr149_Mvb12a
109564	Sst Chodl	Pfkp-201_ENSMUST00000021614	2.87421e-06	0.00946476	0.590589	Sst Chodl_Pfkp
5830	Pvalb Calb1	Scn1a-203_ENSMUST00000112366	2.2737e-09	7.4441e-06	0.593641	Pvalb Calb1_Scn1a
89786	L6 IT Sulf_2	Tsg101-205_ENSMUST00000156335	8.24335e-07	0.00430715	0.593665	L6 IT Sulf_2_Tsg101
7297	L6 IT Sulf_1	Tmem127-201_ENSMUST00000035871	1.06994e-06	0.00655766	0.594339	L6 IT Sulf_1_Tmem127
26227	Lamp5 Egln3_1	Calm3-204_ENSMUST00000173557	1.76291e-07	0.000352759	0.594763	Lamp5 Egln3_1_Calm3
610746	Vip Serpinf1	Pmm1-201_ENSMUST00000023112	1.66394e-06	0.00435121	0.594776	Vip Serpinf1_Pmm1
40553	L6b Kcnip1_1	Idh3a-204_ENSMUST00000215273	4.70259e-09	2.51683e-05	0.59548	L6b Kcnip1_1_Idh3a
121692	L6 IT Sulf_2	Egr1-201_ENSMUST00000064795	5.63049e-07	0.00294193	0.596532	L6 IT Sulf_2_Egr1
75794	Pvalb Gpr149	2410004B18Rik-201_ENSMUST00000039571	4.04351e-07	0.00160527	0.598407	Pvalb Gpr149_2410004B18Rik
73606	L2/3 IT Macc1	Mbnl1-201_ENSMUST00000099087	1.80392e-07	0.00110039	0.599421	L2/3 IT Macc1_Mbnl1
92749	Pvalb Gpr149	Pcmt1-210_ENSMUST00000163085	1.85611e-07	0.000736876	0.599632	Pvalb Gpr149_Pcmt1
332027	L6b Shisa6	Ndufa5-201_ENSMUST00000023851	4.95327e-37	2.65248e-33	0.600833	L6b Shisa6_Ndufa5
505845	Vip Lmo1	Ap1s2-201_ENSMUST00000033734	4.27829e-06	0.00726882	0.60123	Vip Lmo1_Ap1s2
44258	Pvalb Calb1	Gria1-201_ENSMUST00000036315	7.03386e-08	0.000230288	0.60261	Pvalb Calb1_Gria1
167001	L6b Ror1_1	Uqcr10-203_ENSMUST00000151559	2.69968e-09	1.23942e-05	0.604029	L6b Ror1_1_Uqcr10
281230	Vip Crispld2	Myl6-206_ENSMUST00000218127	3.24252e-13	5.13939e-10	0.605212	Vip Crispld2_Myl6
110380	Vip Chat_1	Auh-201_ENSMUST00000021913	7.76245e-07	0.00159674	0.605545	Vip Chat_1_Auh
268793	Sst Etv1	Psph-201_ENSMUST00000031399	2.49618e-06	0.00812007	0.60588	Sst Etv1_Psph
24618	L6 CT Gpr139	Emc3-201_ENSMUST00000032425	7.40285e-08	0.000412783	0.605981	L6 CT Gpr139_Emc3
71346	Vip Chat_1	Mcts1-201_ENSMUST00000000365	4.32223e-06	0.00889084	0.608104	Vip Chat_1_Mcts1
280607	Sst Etv1	Atp2b1-201_ENSMUST00000020107	2.85197e-06	0.00927747	0.608835	Sst Etv1_Atp2b1
254393	Vip Crispld2	1700020I14Rik-202_ENSMUST00000153581	1.02346e-06	0.00162219	0.609944	Vip Crispld2_1700020I14Rik
318434	L6b Shisa6	Rgs19-201_ENSMUST00000002532	3.47857e-07	0.00186277	0.610606	L6b Shisa6_Rgs19
121592	Sst Chodl	Celf4-202_ENSMUST00000115816	6.02288e-07	0.00198334	0.610822	Sst Chodl_Celf4
123450	L6b Kcnip1_2	Cnnm1-201_ENSMUST00000165311	3.07439e-07	0.00168938	0.612376	L6b Kcnip1_2_Cnnm1
33240	L6 IT Sulf_1	Zdhhc17-201_ENSMUST00000041723	1.67119e-07	0.00102427	0.612388	L6 IT Sulf_1_Zdhhc17
250925	Pvalb Vipr2	Hnrnpu-201_ENSMUST00000037748	1.40529e-06	0.00493817	0.612681	Pvalb Vipr2_Hnrnpu
118273	Sst Chodl	Cd200-202_ENSMUST00000163230	2.46492e-06	0.00811698	0.612765	Sst Chodl_Cd200
92026	Vip Chat_1	Rgs10-201_ENSMUST00000033133	4.29557e-06	0.00883598	0.613248	Vip Chat_1_Rgs10
37158	L5 NP Slc17a8	Gng2-204_ENSMUST00000160013	1.54743e-06	0.0057286	0.614236	L5 NP Slc17a8_Gng2
65290	Pvalb Gpr149	Adss-201_ENSMUST00000016105	2.26793e-07	0.000900367	0.615917	Pvalb Gpr149_Adss
102436	Pvalb Gpr149	Wdr61-203_ENSMUST00000121204	1.03276e-06	0.00410006	0.617255	Pvalb Gpr149_Wdr61
514391	Vip Lmo1	Uchl1-202_ENSMUST00000176015	1.39764e-09	2.37459e-06	0.617487	Vip Lmo1_Uchl1
206968	L6b Ror1_2	Tpst1-201_ENSMUST00000040721	8.89489e-07	0.00432114	0.617738	L6b Ror1_2_Tpst1
19481	L6 IT Sulf_1	Gabra2-203_ENSMUST00000197284	2.54989e-07	0.00156283	0.618739	L6 IT Sulf_1_Gabra2
249284	L6b Rprm	Usp40-203_ENSMUST00000186670	1.40904e-07	0.00062505	0.619436	L6b Rprm_Usp40
60008	Pvalb Calb1	Ppp2r2b-202_ENSMUST00000117687	2.20062e-09	7.20482e-06	0.620363	Pvalb Calb1_Ppp2r2b
105745	L6 IT Sulf_2	Adra1b-202_ENSMUST00000124306	1.94639e-07	0.00101699	0.62084	L6 IT Sulf_2_Adra1b
105746	L6 IT Sulf_2	Adra1b-204_ENSMUST00000167574	1.94639e-07	0.00101699	0.62084	L6 IT Sulf_2_Adra1b
86966	Pvalb Gpr149	Mlf2-201_ENSMUST00000032214	1.01324e-06	0.00402256	0.622685	Pvalb Gpr149_Mlf2
116119	L2/3 IT Macc1	Abcd2-201_ENSMUST00000069511	1.08478e-07	0.000661716	0.623273	L2/3 IT Macc1_Abcd2
52035	L2/3 IT Cdh13 Sla	Meg3-202_ENSMUST00000126289	2.33236e-12	1.24525e-08	0.623302	L2/3 IT Cdh13 Sla_Meg3
216495	Pvalb Th	Pcmt1-210_ENSMUST00000163085	1.32721e-07	0.000400021	0.623527	Pvalb Th_Pcmt1
134116	L6b Ror1_1	Cstf2-201_ENSMUST00000033609	2.68372e-07	0.00123209	0.623949	L6b Ror1_1_Cstf2
7801	L6 IT Sulf_1	Napb-201_ENSMUST00000028926	2.479e-10	1.51938e-06	0.62585	L6 IT Sulf_1_Napb
3954	L6 CT Gpr139	Sec61a2-202_ENSMUST00000102981	1.03164e-07	0.000575242	0.627082	L6 CT Gpr139_Sec61a2
277949	Sst Etv1	Fuom-201_ENSMUST00000026539	2.50769e-07	0.000815753	0.627498	Sst Etv1_Fuom
46904	L5 NP Slc17a8	Prkca-201_ENSMUST00000059595	1.0924e-06	0.00404405	0.629644	L5 NP Slc17a8_Prkca
306583	Lamp5 Slc35d3	Slc25a23-201_ENSMUST00000040280	3.46689e-07	0.00109138	0.630618	Lamp5 Slc35d3_Slc25a23
5307	L6 IT Sulf_1	Fbxw2-206_ENSMUST00000113080	3.72196e-07	0.00228119	0.630955	L6 IT Sulf_1_Fbxw2
297	Sst C1ql3	Ogfrl1-201_ENSMUST00000027343	1.03883e-06	0.003558	0.632086	Sst C1ql3_Ogfrl1
373456	Sst Myh8_2	Rab3gap1-205_ENSMUST00000186865	1.45797e-07	0.00039234	0.632118	Sst Myh8_2_Rab3gap1
137548	Lamp5 Lhx6	Adh5-201_ENSMUST00000005964	2.60203e-07	0.000893796	0.633536	Lamp5 Lhx6_Adh5
355325	L6b Shisa6	Luc7l3-201_ENSMUST00000021226	1.50514e-06	0.00806	0.634778	L6b Shisa6_Luc7l3
598540	Vip Serpinf1	Morf4l1-204_ENSMUST00000187771	9.45574e-08	0.000247268	0.636054	Vip Serpinf1_Morf4l1
634	L2/3 IT Cdh13 Sla	Pantr1-209_ENSMUST00000181725	1.64733e-08	8.79511e-05	0.63641	L2/3 IT Cdh13 Sla_Pantr1
296388	L6b Rprm	Zfp934-204_ENSMUST00000221250	3.12034e-14	1.38418e-10	0.637447	L6b Rprm_Zfp934
123726	L6b Kcnip1_2	Fam45a-201_ENSMUST00000025957	5.2982e-08	0.000291136	0.639532	L6b Kcnip1_2_Fam45a
560163	Vip Serpinf1	Pea15a-201_ENSMUST00000013842	7.02645e-09	1.83742e-05	0.639833	Vip Serpinf1_Pea15a
133164	Sst Crhr2_1	Zcchc12-201_ENSMUST00000048067	1.88373e-06	0.00670608	0.640749	Sst Crhr2_1_Zcchc12
379970	Vip Htr1f	Gnas-206_ENSMUST00000109084	8.26276e-10	1.23941e-06	0.642695	Vip Htr1f_Gnas
585509	Vip Serpinf1	Tmem126a-201_ENSMUST00000032844	2.16476e-08	5.66084e-05	0.642757	Vip Serpinf1_Tmem126a
179641	Sst Crhr2_1	Fgf12-205_ENSMUST00000232352	1.80616e-08	6.42993e-05	0.642881	Sst Crhr2_1_Fgf12
1250	Sst C1ql3	Lancl1-202_ENSMUST00000113979	4.04191e-08	0.000138435	0.643635	Sst C1ql3_Lancl1
31270	L2/3 IT Cdh13 Sla	Tpd52l1-201_ENSMUST00000000305	8.26825e-07	0.00441442	0.64666	L2/3 IT Cdh13 Sla_Tpd52l1
7612	L6 IT Sulf_1	Plcb1-202_ENSMUST00000110116	7.71564e-08	0.000472892	0.647388	L6 IT Sulf_1_Plcb1
23989	L6 IT Sulf_1	Pcyox1-201_ENSMUST00000032065	2.72003e-07	0.00166711	0.647669	L6 IT Sulf_1_Pcyox1
302497	Sst Etv1	Abat-201_ENSMUST00000065987	6.17177e-07	0.00200768	0.64858	Sst Etv1_Abat
580398	Vip Serpinf1	Serbp1-207_ENSMUST00000203436	1.00475e-08	2.62743e-05	0.648716	Vip Serpinf1_Serbp1
169893	L6 CT Grp_2	Cisd3-201_ENSMUST00000107583	5.99229e-07	0.00285832	0.649159	L6 CT Grp_2_Cisd3
558421	Vip Serpinf1	Scg2-202_ENSMUST00000185234	2.91201e-07	0.000761491	0.651488	Vip Serpinf1_Scg2
79451	Vip Chat_1	Camta1-207_ENSMUST00000140030	3.20299e-08	6.58854e-05	0.652847	Vip Chat_1_Camta1
209081	L6 CT Nxph2_1	Herc3-202_ENSMUST00000041401	2.41872e-06	0.00972566	0.65305	L6 CT Nxph2_1_Herc3
43030	L6 IT Sulf_1	9530059O14Rik-203_ENSMUST00000181719	6.40157e-07	0.00392352	0.65335	L6 IT Sulf_1_9530059O14Rik
124168	L2/3 IT S100a6	Arhgef4-205_ENSMUST00000160855	1.2123e-10	6.39248e-07	0.653626	L2/3 IT S100a6_Arhgef4
150480	L6 CT Grp_2	Paf1-201_ENSMUST00000003529	4.42046e-07	0.00210856	0.654301	L6 CT Grp_2_Paf1
294627	L6b Rprm	H3f3b-204_ENSMUST00000139623	4.39209e-08	0.000194833	0.654625	L6b Rprm_H3f3b
275987	Lamp5 Slc35d3	Btbd1-201_ENSMUST00000026093	2.8449e-06	0.00895575	0.654786	Lamp5 Slc35d3_Btbd1
201247	Lamp5 Pdlim5	Sgip1-212_ENSMUST00000142430	1.52966e-14	3.22453e-11	0.656323	Lamp5 Pdlim5_Sgip1
191681	Pvalb Th	Chn1-208_ENSMUST00000154258	3.24092e-06	0.00976812	0.658029	Pvalb Th_Chn1
297059	Lamp5 Slc35d3	Scamp1-201_ENSMUST00000022197	9.08711e-07	0.00286062	0.658734	Lamp5 Slc35d3_Scamp1
76642	Vip Chat_1	Vcp-201_ENSMUST00000030164	2.24479e-06	0.00461754	0.658862	Vip Chat_1_Vcp
15187	L5 NP Slc17a8	Ugcg-201_ENSMUST00000030074	1.71899e-06	0.0063637	0.659163	L5 NP Slc17a8_Ugcg
22551	Sst C1ql3	2610001J05Rik-202_ENSMUST00000155856	1.79796e-06	0.00615802	0.659633	Sst C1ql3_2610001J05Rik
105860	Vip Chat_1	Sqstm1-204_ENSMUST00000136936	6.40408e-07	0.00131732	0.660248	Vip Chat_1_Sqstm1
276681	L6b Rprm	Ilk-201_ENSMUST00000033182	5.06769e-07	0.00224803	0.660691	L6b Rprm_Ilk
22661	L6b Kcnip1_1	Ndufa5-202_ENSMUST00000118558	1.5471e-10	8.28008e-07	0.66089	L6b Kcnip1_1_Ndufa5
53161	L2/3 IT Cdh13 Sla	Ly6e-213_ENSMUST00000191127	8.55299e-08	0.000456644	0.660914	L2/3 IT Cdh13 Sla_Ly6e
255186	Lamp5 Slc35d3	Snrpb2-201_ENSMUST00000008477	1.67256e-06	0.00526521	0.662049	Lamp5 Slc35d3_Snrpb2
153010	Sst Crhr2_1	Nrip3-201_ENSMUST00000033331	1.54782e-06	0.00551025	0.663465	Sst Crhr2_1_Nrip3
156970	L6b Ror1_1	Syt1-206_ENSMUST00000156979	3.02502e-07	0.00138879	0.666047	L6b Ror1_1_Syt1
138215	Sst Crhr2_1	Fut9-201_ENSMUST00000084770	2.7913e-06	0.00993703	0.666285	Sst Crhr2_1_Fut9
237495	L6b Ror1_2	Itpk1-201_ENSMUST00000046518	6.3453e-07	0.00308255	0.666781	L6b Ror1_2_Itpk1
4217	L6b Kcnip1_1	Msrb2-201_ENSMUST00000023856	6.76438e-07	0.0036203	0.666993	L6b Kcnip1_1_Msrb2
23325	Sst C1ql3	Snx10-201_ENSMUST00000049152	2.51058e-06	0.00859872	0.667675	Sst C1ql3_Snx10
62471	L6b Kcnip1_2	Pdcl3-204_ENSMUST00000194552	6.4061e-07	0.00352015	0.668303	L6b Kcnip1_2_Pdcl3
40827	L6b Kcnip1_1	Arih1-207_ENSMUST00000171975	1.69154e-06	0.00905314	0.668755	L6b Kcnip1_1_Arih1
179964	Sst Crhr2_1	Iqcb1-203_ENSMUST00000129123	5.76601e-07	0.0020527	0.668922	Sst Crhr2_1_Iqcb1
499996	Vip Lmo1	BC005624-201_ENSMUST00000028205	1.97963e-06	0.0033634	0.668972	Vip Lmo1_BC005624
242505	Pvalb Th	Cryzl1-203_ENSMUST00000117644	1.40325e-06	0.0042294	0.669831	Pvalb Th_Cryzl1
8192	Vip C1ql1	Rbm39-205_ENSMUST00000128243	3.32363e-06	0.00662732	0.669935	Vip C1ql1_Rbm39
282515	Pvalb Vipr2	Cope-208_ENSMUST00000168018	7.99245e-07	0.00280855	0.67018	Pvalb Vipr2_Cope
19715	L6b Kcnip1_1	Epha5-204_ENSMUST00000113401	1.10011e-12	5.88777e-09	0.671898	L6b Kcnip1_1_Epha5
285996	Lamp5 Slc35d3	Fgf9-203_ENSMUST00000165526	7.76557e-07	0.0024446	0.671983	Lamp5 Slc35d3_Fgf9
606097	Vip Serpinf1	Ccdc127-201_ENSMUST00000022063	8.91909e-07	0.00233234	0.672434	Vip Serpinf1_Ccdc127
44668	L6 IT Sulf_1	Myh10-206_ENSMUST00000139059	6.22811e-07	0.00381721	0.673903	L6 IT Sulf_1_Myh10
121702	Pvalb Gpr149	Gm28285-207_ENSMUST00000190570	2.08788e-07	0.000828887	0.674217	Pvalb Gpr149_Gm28285
69368	L6 NP Trh	1700037H04Rik-207_ENSMUST00000184535	2.57088e-06	0.00950197	0.676098	L6 NP Trh_1700037H04Rik
245338	Pvalb Th	Celf4-202_ENSMUST00000115816	1.0182e-08	3.06886e-05	0.676138	Pvalb Th_Celf4
83411	L6 IT Sulf_2	Tmem120a-201_ENSMUST00000043378	1.83253e-06	0.00957496	0.678086	L6 IT Sulf_2_Tmem120a
89941	Vip Chat_1	B230209E15Rik-201_ENSMUST00000209115	3.9729e-06	0.00817226	0.678363	Vip Chat_1_B230209E15Rik
568293	Vip Serpinf1	Hspa4l-208_ENSMUST00000204702	2.09094e-07	0.00054678	0.680198	Vip Serpinf1_Hspa4l
321696	L6b Shisa6	Dpm3-201_ENSMUST00000040824	1.38892e-08	7.43766e-05	0.68031	L6b Shisa6_Dpm3
7430	Pvalb Calb1	Ptpra-202_ENSMUST00000077303	2.78611e-08	9.12173e-05	0.680412	Pvalb Calb1_Ptpra
63187	Pvalb Gpr149	Pnkd-201_ENSMUST00000027370	3.57486e-07	0.00141922	0.682265	Pvalb Gpr149_Pnkd
558422	Vip Serpinf1	Scg2-201_ENSMUST00000049972	6.25274e-08	0.000163509	0.683539	Vip Serpinf1_Scg2
98098	Vip Chat_1	Nutf2-201_ENSMUST00000008594	4.03483e-06	0.00829965	0.683653	Vip Chat_1_Nutf2
47655	L6 IT Sulf_1	Asb13-201_ENSMUST00000042288	6.76584e-07	0.00414678	0.685214	L6 IT Sulf_1_Asb13
135695	Sst Crhr2_1	Glrb-201_ENSMUST00000029654	2.22089e-08	7.90638e-05	0.685298	Sst Crhr2_1_Glrb
361400	L6b Shisa6	Meg3-202_ENSMUST00000126289	3.22876e-10	1.729e-06	0.685392	L6b Shisa6_Meg3
115174	Pvalb Gpr149	Cyc1-202_ENSMUST00000229013	1.56417e-08	6.20977e-05	0.687343	Pvalb Gpr149_Cyc1
27740	L2/3 IT Cdh13 Sla	Ftl1-205_ENSMUST00000211500	1.32805e-06	0.00709047	0.688252	L2/3 IT Cdh13 Sla_Ftl1
2235	L6 IT Sulf_1	R3hdm1-206_ENSMUST00000187557	1.85332e-09	1.1359e-05	0.690195	L6 IT Sulf_1_R3hdm1
254880	L6 CT Nxph2_2	Nop56-202_ENSMUST00000103198	1.13954e-06	0.00341519	0.690752	L6 CT Nxph2_2_Nop56
168798	Sst Crhr2_1	Rpain-201_ENSMUST00000018593	1.19069e-06	0.00423884	0.692289	Sst Crhr2_1_Rpain
20667	L6 CT Gpr139	Tesc-201_ENSMUST00000031304	7.40303e-07	0.00412793	0.692949	L6 CT Gpr139_Tesc
49991	Sst C1ql3	Mocs2-207_ENSMUST00000166104	5.40584e-07	0.0018515	0.69312	Sst C1ql3_Mocs2
415240	Sst Myh8_2	Hnrnph1-201_ENSMUST00000069304	3.17194e-06	0.00853569	0.693333	Sst Myh8_2_Hnrnph1
509696	Vip Lmo1	Ccl27a-206_ENSMUST00000108037	1.9291e-07	0.000327754	0.693426	Vip Lmo1_Ccl27a
5115	L6 IT Sulf_1	Dnm1-201_ENSMUST00000078352	2.44894e-07	0.00150095	0.69357	L6 IT Sulf_1_Dnm1
10370	L6 IT Sulf_1	Cstf2-201_ENSMUST00000033609	1.34375e-09	8.23586e-06	0.694452	L6 IT Sulf_1_Cstf2
256966	Sst Etv1	Mcts1-203_ENSMUST00000134573	3.31529e-10	1.07846e-06	0.694658	Sst Etv1_Mcts1
24049	L6 IT Sulf_1	Gmcl1-201_ENSMUST00000001185	9.50814e-08	0.000582754	0.69487	L6 IT Sulf_1_Gmcl1
378939	Vip Htr1f	Pcsk2-201_ENSMUST00000028905	3.50087e-07	0.00052513	0.695141	Vip Htr1f_Pcsk2
21004	L6b Kcnip1_1	Diablo-203_ENSMUST00000111587	4.34618e-07	0.00232608	0.695143	L6b Kcnip1_1_Diablo
173041	L6 CT Grp_2	Glrx-201_ENSMUST00000022082	7.12099e-07	0.00339671	0.695553	L6 CT Grp_2_Glrx
219451	Sst Crhr2_2	Mcoln1-201_ENSMUST00000004683	1.00442e-08	3.35476e-05	0.696407	Sst Crhr2_2_Mcoln1
271124	L6b Rprm	St3gal5-202_ENSMUST00000114112	1.62436e-09	7.20566e-06	0.696453	L6b Rprm_St3gal5
513205	Vip Lmo1	Psmc2-201_ENSMUST00000030769	5.05095e-06	0.00858157	0.697769	Vip Lmo1_Psmc2
184814	L6 CT Grp_2	1810009A15Rik-201_ENSMUST00000096251	1.8424e-06	0.00878824	0.701711	L6 CT Grp_2_1810009A15Rik
108020	Pvalb Gpr149	Cisd3-201_ENSMUST00000107583	1.20762e-06	0.00479424	0.703746	Pvalb Gpr149_Cisd3
556881	Vip Serpinf1	Atp6v1h-201_ENSMUST00000044369	1.06407e-07	0.000278254	0.703871	Vip Serpinf1_Atp6v1h
44330	L6 CT Gpr139	Mrpl55-203_ENSMUST00000108785	1.70095e-07	0.000948451	0.706506	L6 CT Gpr139_Mrpl55
116242	Pvalb Gpr149	Pfkm-201_ENSMUST00000051226	2.31202e-06	0.00917873	0.706634	Pvalb Gpr149_Pfkm
9233	L6 IT Sulf_1	Rbm3-202_ENSMUST00000115615	2.17746e-08	0.000133457	0.707691	L6 IT Sulf_1_Rbm3
324261	Vip Gpc3	Clta-205_ENSMUST00000107851	3.91678e-10	6.61545e-07	0.707939	Vip Gpc3_Clta
602486	Vip Serpinf1	Ap2b1-201_ENSMUST00000018875	1.81587e-06	0.00474851	0.708938	Vip Serpinf1_Ap2b1
612138	Vip Serpinf1	Mapk1-201_ENSMUST00000069107	3.51878e-06	0.00920162	0.709042	Vip Serpinf1_Mapk1
114428	Lamp5 Egln3_2	Ctnnd2-201_ENSMUST00000081728	2.37426e-07	0.000568635	0.709642	Lamp5 Egln3_2_Ctnnd2
57100	L2/3 IT Cdh13 Sla	Tiam2-206_ENSMUST00000226913	1.3561e-07	0.000724019	0.709903	L2/3 IT Cdh13 Sla_Tiam2
59185	Pvalb Calb1	Dlgap1-207_ENSMUST00000133983	2.33365e-10	7.64036e-07	0.71076	Pvalb Calb1_Dlgap1
125366	L6b Ror1_1	Mff-205_ENSMUST00000160632	1.45763e-14	6.69198e-11	0.711604	L6b Ror1_1_Mff
255622	Pvalb Vipr2	Ergic3-201_ENSMUST00000006035	6.10644e-07	0.0021458	0.716158	Pvalb Vipr2_Ergic3
106743	Pvalb Gpr149	Elp5-203_ENSMUST00000123701	6.26059e-11	2.48545e-07	0.716183	Pvalb Gpr149_Elp5
99887	Sst Chodl	Apex1-201_ENSMUST00000049411	8.95203e-07	0.0029479	0.718298	Sst Chodl_Apex1
224660	Lamp5 Pdlim5	Klf12-203_ENSMUST00000226544	1.15144e-08	2.42724e-05	0.718825	Lamp5 Pdlim5_Klf12
7890	L6 IT Sulf_1	Srxn1-201_ENSMUST00000041500	1.06916e-06	0.0065529	0.718837	L6 IT Sulf_1_Srxn1
75694	Lamp5 Egln3_2	Tspan5-207_ENSMUST00000142890	7.81547e-07	0.00187181	0.719297	Lamp5 Egln3_2_Tspan5
18540	Sst C1ql3	Cgref1-201_ENSMUST00000031051	9.24357e-07	0.00316592	0.720511	Sst C1ql3_Cgref1
308443	Sst Etv1	Bad-202_ENSMUST00000113423	6.9192e-09	2.25082e-05	0.721893	Sst Etv1_Bad
257624	L6b Rprm	Pja1-204_ENSMUST00000113797	1.79223e-06	0.00795035	0.722025	L6b Rprm_Pja1
31402	L2/3 IT Cdh13 Sla	Wasf1-201_ENSMUST00000019975	8.07522e-08	0.000431136	0.722326	L2/3 IT Cdh13 Sla_Wasf1
171057	Vip Chat_2	Timp2-201_ENSMUST00000017610	6.16898e-07	0.000745213	0.72245	Vip Chat_2_Timp2
5462	L6b Kcnip1_1	Scai-201_ENSMUST00000038874	1.61734e-09	8.65603e-06	0.722467	L6b Kcnip1_1_Scai
81370	Sst Chodl	Commd8-202_ENSMUST00000196152	4.14164e-08	0.000136384	0.722632	Sst Chodl_Commd8
282258	Vip Crispld2	Galntl6-208_ENSMUST00000204128	1.06498e-07	0.000168799	0.722637	Vip Crispld2_Galntl6
49403	L6b Kcnip1_1	Mef2c-223_ENSMUST00000199105	3.34783e-07	0.00179176	0.723801	L6b Kcnip1_1_Mef2c
43696	Sst C1ql3	Rtn4-201_ENSMUST00000060992	6.69181e-08	0.000229195	0.725418	Sst C1ql3_Rtn4
590614	Vip Serpinf1	Rpl41-206_ENSMUST00000177163	1.50031e-08	3.92331e-05	0.726157	Vip Serpinf1_Rpl41
60956	L6b Kcnip1_1	Vegfb-202_ENSMUST00000130048	1.0067e-08	5.38784e-05	0.726848	L6b Kcnip1_1_Vegfb
250950	Pvalb Vipr2	Sccpdh-201_ENSMUST00000040538	1.30901e-06	0.00459985	0.727302	Pvalb Vipr2_Sccpdh
4610	L6 IT Sulf_1	Pmpca-201_ENSMUST00000076431	1.06101e-09	6.50293e-06	0.729002	L6 IT Sulf_1_Pmpca
265631	Lamp5 Slc35d3	Cacna2d1-202_ENSMUST00000078272	1.18862e-06	0.00374176	0.731769	Lamp5 Slc35d3_Cacna2d1
16363	L6 CT Gpr139	Akirin1-201_ENSMUST00000102636	9.06651e-07	0.00505549	0.731959	L6 CT Gpr139_Akirin1
272175	Lamp5 Slc35d3	Syn2-201_ENSMUST00000009538	1.08642e-06	0.00342006	0.73261	Lamp5 Slc35d3_Syn2
190664	Sst Crhr2_2	Ass1-201_ENSMUST00000102840	1.64996e-06	0.00551086	0.732814	Sst Crhr2_2_Ass1
6055	Sst C1ql3	Chn1-202_ENSMUST00000102677	3.15926e-08	0.000108204	0.734531	Sst C1ql3_Chn1
41459	L6 IT Sulf_1	Slc17a5-201_ENSMUST00000052441	1.43244e-06	0.00877943	0.734782	L6 IT Sulf_1_Slc17a5
192742	Pvalb Th	Ckmt1-201_ENSMUST00000000317	5.43761e-10	1.6389e-06	0.735893	Pvalb Th_Ckmt1
10760	Sst C1ql3	Sms-201_ENSMUST00000112529	1.09418e-06	0.00374756	0.738769	Sst C1ql3_Sms
53180	L6 CT Gpr139	Ly6h-204_ENSMUST00000127095	6.46579e-07	0.00360532	0.740173	L6 CT Gpr139_Ly6h
29376	L6 IT Sulf_1	Btbd10-202_ENSMUST00000117577	2.56944e-12	1.57481e-08	0.740723	L6 IT Sulf_1_Btbd10
111569	Vip Chat_1	Map1b-201_ENSMUST00000064762	5.20928e-12	1.07155e-08	0.744274	Vip Chat_1_Map1b
46592	L6 IT Sulf_1	Rundc3a-202_ENSMUST00000107102	5.89655e-08	0.000361399	0.745366	L6 IT Sulf_1_Rundc3a
95746	Sst Chodl	Pet100-206_ENSMUST00000208950	1.81594e-06	0.00597988	0.746873	Sst Chodl_Pet100
19262	L6 IT Sulf_1	Stim2-203_ENSMUST00000201198	1.81167e-07	0.00111037	0.747407	L6 IT Sulf_1_Stim2
75126	Sncg Slc17a8	Sars-201_ENSMUST00000090553	2.11893e-07	0.00114062	0.747892	Sncg Slc17a8_Sars
980	Vip C1ql1	Fam126b-207_ENSMUST00000161600	4.67229e-06	0.00931655	0.748199	Vip C1ql1_Fam126b
616899	Vip Serpinf1	Ap3s1-201_ENSMUST00000025357	1.01518e-06	0.00265469	0.752755	Vip Serpinf1_Ap3s1
307639	Pvalb Vipr2	Csnk1a1-204_ENSMUST00000165123	1.96232e-13	6.89558e-10	0.753637	Pvalb Vipr2_Csnk1a1
40988	Pvalb Calb1	Rab11a-206_ENSMUST00000169058	5.01594e-07	0.00164222	0.754487	Pvalb Calb1_Rab11a
236432	Pvalb Th	Brms1l-201_ENSMUST00000059250	2.69647e-06	0.00812715	0.756056	Pvalb Th_Brms1l
586628	Vip Serpinf1	Eif3c-201_ENSMUST00000032992	3.6529e-06	0.00955234	0.756134	Vip Serpinf1_Eif3c
22710	L6 CT Gpr139	Rbm28-201_ENSMUST00000007993	1.93649e-08	0.000107979	0.756372	L6 CT Gpr139_Rbm28
188238	Vip Chat_3	Brinp3-201_ENSMUST00000074622	1.34125e-07	0.000165242	0.757902	Vip Chat_3_Brinp3
57002	L6b Kcnip1_1	Ttc3-216_ENSMUST00000147046	2.07969e-07	0.00111305	0.758973	L6b Kcnip1_1_Ttc3
475672	Vip Igfbp6	Map4-207_ENSMUST00000196729	1.39009e-06	0.00154995	0.759643	Vip Igfbp6_Map4
34720	Sncg	C130073E24Rik-202_ENSMUST00000211313	1.96715e-07	0.00052995	0.760409	Sncg_C130073E24Rik
606088	Vip Serpinf1	Sdha-201_ENSMUST00000022062	5.16777e-10	1.35137e-06	0.761368	Vip Serpinf1_Sdha
46807	L6 CT Gpr139	Limd2-202_ENSMUST00000064545	6.22967e-07	0.00347366	0.762081	L6 CT Gpr139_Limd2
111168	L6b Kcnip1_2	Glrx-201_ENSMUST00000022082	6.0846e-07	0.00334349	0.762164	L6b Kcnip1_2_Glrx
569267	Vip Serpinf1	Hax1-201_ENSMUST00000079724	7.0269e-07	0.00183754	0.76291	Vip Serpinf1_Hax1
287521	Sst Etv1	Ubash3b-201_ENSMUST00000044155	1.50969e-08	4.91102e-05	0.76742	Sst Etv1_Ubash3b
290055	Lamp5 Slc35d3	Map4-204_ENSMUST00000164930	8.66076e-07	0.00272641	0.769514	Lamp5 Slc35d3_Map4
76991	Vip Chat_1	Rad23b-201_ENSMUST00000030134	1.89391e-06	0.00389577	0.770344	Vip Chat_1_Rad23b
81901	Sst Chodl	Mapk10-212_ENSMUST00000170792	3.98614e-07	0.00131264	0.770757	Sst Chodl_Mapk10
2234	L6 IT Sulf_1	R3hdm1-205_ENSMUST00000187023	4.5979e-11	2.81805e-07	0.770781	L6 IT Sulf_1_R3hdm1
369789	Vip Gpc3	Gm16286-202_ENSMUST00000125127	5.25243e-07	0.000887135	0.771472	Vip Gpc3_Gm16286
215302	Pvalb Th	Lcmt1-201_ENSMUST00000033025	6.19083e-07	0.00186592	0.772911	Pvalb Th_Lcmt1
61738	L2/3 IT Cdh13 Sla	Stn1-208_ENSMUST00000182873	1.70959e-07	0.000912752	0.773744	L2/3 IT Cdh13 Sla_Stn1
28571	Sst C1ql3	Grm5-202_ENSMUST00000125009	1.74905e-06	0.00599051	0.773993	Sst C1ql3_Grm5
66988	L2/3 IT Macc1	Dnm1-201_ENSMUST00000078352	2.36175e-07	0.00144067	0.775359	L2/3 IT Macc1_Dnm1
170895	L6 CT Grp_2	Mrpl38-201_ENSMUST00000106439	1.85909e-07	0.000886787	0.775728	L6 CT Grp_2_Mrpl38
233967	Pvalb Th	Dtnbp1-201_ENSMUST00000072329	8.41921e-08	0.000253755	0.777203	Pvalb Th_Dtnbp1
38947	Vip C1ql1	Akap11-202_ENSMUST00000123853	1.23334e-06	0.00245928	0.777479	Vip C1ql1_Akap11
607625	Vip Serpinf1	Cfl2-203_ENSMUST00000221374	7.05508e-07	0.0018449	0.779122	Vip Serpinf1_Cfl2
283396	Lamp5 Slc35d3	Herpud1-205_ENSMUST00000161576	4.08058e-07	0.00128457	0.78013	Lamp5 Slc35d3_Herpud1
60720	L6 CT Gpr139	Drap1-209_ENSMUST00000136579	6.27346e-07	0.00349808	0.780281	L6 CT Gpr139_Drap1
136128	L6 CT Grp_2	Pmvk-201_ENSMUST00000029564	6.35873e-07	0.00303311	0.781537	L6 CT Grp_2_Pmvk
69574	Vip Chat_1	Pcsk2-201_ENSMUST00000028905	3.07789e-06	0.00633122	0.782204	Vip Chat_1_Pcsk2
608924	Vip Serpinf1	Hsp90aa1-201_ENSMUST00000021698	8.49252e-07	0.00222079	0.783672	Vip Serpinf1_Hsp90aa1
299938	Pvalb Vipr2	Sub1-201_ENSMUST00000022816	4.46433e-07	0.00156877	0.784325	Pvalb Vipr2_Sub1
235395	L6 CT Nxph2_1	Pik3r1-201_ENSMUST00000035532	2.2496e-11	9.04562e-08	0.785566	L6 CT Nxph2_1_Pik3r1
48545	L6 CT Gpr139	4833439L19Rik-201_ENSMUST00000026989	4.4795e-09	2.49777e-05	0.787	L6 CT Gpr139_4833439L19Rik
120986	Pvalb Gpr149	Pja2-204_ENSMUST00000172818	9.24227e-08	0.000366918	0.788451	Pvalb Gpr149_Pja2
152102	L6 CT Grp_2	Ngrn-201_ENSMUST00000117989	3.05998e-08	0.000145961	0.790948	L6 CT Grp_2_Ngrn
43841	L6 IT Sulf_1	Gabrb2-201_ENSMUST00000007797	2.44943e-07	0.00150126	0.791193	L6 IT Sulf_1_Gabrb2
611126	Vip Serpinf1	Yaf2-202_ENSMUST00000133736	1.08413e-06	0.002835	0.792798	Vip Serpinf1_Yaf2
39011	L5 NP Slc17a8	Mzt1-201_ENSMUST00000042662	7.94119e-07	0.00293983	0.793322	L5 NP Slc17a8_Mzt1
126172	L6 IT Sulf_3	Atp2b4-207_ENSMUST00000165602	3.3562e-09	1.60493e-05	0.793408	L6 IT Sulf_3_Atp2b4
13411	Sst C1ql3	Plppr4-201_ENSMUST00000061071	5.64829e-07	0.00193454	0.793859	Sst C1ql3_Plppr4
125059	Lamp5 Lhx6	Pnkd-204_ENSMUST00000113805	2.3648e-07	0.000812309	0.797408	Lamp5 Lhx6_Pnkd
97174	L6b Kcnip1_2	Rab8a-202_ENSMUST00000128203	8.9544e-07	0.00492044	0.797624	L6b Kcnip1_2_Rab8a
298238	Vip Crispld2	Npas3-201_ENSMUST00000101432	2.6164e-06	0.00414699	0.798233	Vip Crispld2_Npas3
10370	L6b Kcnip1_1	Cstf2-201_ENSMUST00000033609	9.97784e-09	5.34014e-05	0.798252	L6b Kcnip1_1_Cstf2
77784	L6b Kcnip1_2	Elavl4-211_ENSMUST00000153200	5.59196e-07	0.00307278	0.8023	L6b Kcnip1_2_Elavl4
268963	Lamp5 Slc35d3	Abhd11-202_ENSMUST00000111216	2.58428e-06	0.0081353	0.803286	Lamp5 Slc35d3_Abhd11
5213	Vip C1ql1	Stxbp1-201_ENSMUST00000050000	3.65033e-06	0.00727875	0.80601	Vip C1ql1_Stxbp1
278202	Lamp5 Slc35d3	Ctsd-201_ENSMUST00000066401	2.00368e-06	0.0063076	0.807193	Lamp5 Slc35d3_Ctsd
589142	Vip Serpinf1	Polr2e-201_ENSMUST00000004786	1.72204e-07	0.000450314	0.808376	Vip Serpinf1_Polr2e
276	L6 IT Sulf_1	Tmem14a-201_ENSMUST00000027064	1.46494e-09	8.97862e-06	0.808689	L6 IT Sulf_1_Tmem14a
308318	Pvalb Vipr2	Zfpl1-201_ENSMUST00000025707	5.89806e-07	0.00207258	0.809341	Pvalb Vipr2_Zfpl1
88790	Pvalb Gpr149	Zfp260-202_ENSMUST00000108200	5.06107e-07	0.00200925	0.810719	Pvalb Gpr149_Zfp260
549908	Vip Lmo1	Cdip1-202_ENSMUST00000117713	1.39372e-06	0.00236794	0.81101	Vip Lmo1_Cdip1
238526	L6 CT Nxph2_1	Deptor-202_ENSMUST00000096433	1.987e-06	0.00798972	0.811011	L6 CT Nxph2_1_Deptor
591348	Vip Serpinf1	Tnks-201_ENSMUST00000033929	9.9478e-07	0.00260135	0.81357	Vip Serpinf1_Tnks
277175	Pvalb Vipr2	Lcmt1-201_ENSMUST00000033025	5.12708e-07	0.00180165	0.814491	Pvalb Vipr2_Lcmt1
83100	Lamp5 Egln3_2	Tmem132b-201_ENSMUST00000031446	1.1482e-06	0.00274993	0.816265	Lamp5 Egln3_2_Tmem132b
15216	L6 IT Sulf_1	Inip-203_ENSMUST00000128548	1.00169e-06	0.00613937	0.816691	L6 IT Sulf_1_Inip
216042	Pvalb Th	Adgra1-203_ENSMUST00000137584	2.00077e-06	0.00603032	0.817778	Pvalb Th_Adgra1
287408	Pvalb Vipr2	Ei24-201_ENSMUST00000115086	6.74684e-07	0.00237084	0.820782	Pvalb Vipr2_Ei24
5310	L6 IT Sulf_1	Fbxw2-208_ENSMUST00000131534	4.41486e-08	0.000270587	0.823367	L6 IT Sulf_1_Fbxw2
2504	L6 IT Sulf_1	Ipo9-201_ENSMUST00000041023	2.5034e-10	1.53433e-06	0.824182	L6 IT Sulf_1_Ipo9
14300	L6 CT Gpr139	2610301B20Rik-201_ENSMUST00000080517	9.85412e-09	5.49466e-05	0.824322	L6 CT Gpr139_2610301B20Rik
30710	L6 CT Gpr139	Ctsd-201_ENSMUST00000066401	3.77382e-08	0.000210428	0.824736	L6 CT Gpr139_Ctsd
280716	Sst Etv1	Syt1-206_ENSMUST00000156979	1.63453e-08	5.31712e-05	0.825055	Sst Etv1_Syt1
288278	Lamp5 Slc35d3	Stoml1-201_ENSMUST00000034883	1.30304e-06	0.00410198	0.82557	Lamp5 Slc35d3_Stoml1
280000	Lamp5 Slc35d3	Sgta-202_ENSMUST00000218208	9.83134e-07	0.00309491	0.826456	Lamp5 Slc35d3_Sgta
102214	L6 IT Sulf_2	Cadm1-202_ENSMUST00000085909	6.56566e-10	3.43056e-06	0.827026	L6 IT Sulf_2_Cadm1
582131	Vip Serpinf1	Fkbp4-201_ENSMUST00000032508	1.20061e-06	0.00313958	0.828752	Vip Serpinf1_Fkbp4
606297	Vip Serpinf1	Ccnh-201_ENSMUST00000022030	1.46546e-08	3.83219e-05	0.829549	Vip Serpinf1_Ccnh
22428	L6 IT Sulf_1	Sgce-201_ENSMUST00000004750	1.22414e-10	7.50275e-07	0.830533	L6 IT Sulf_1_Sgce
558465	Vip Serpinf1	Mff-202_ENSMUST00000078332	7.92269e-16	2.07178e-12	0.831431	Vip Serpinf1_Mff
269957	Lamp5 Slc35d3	Dlx5-201_ENSMUST00000052609	1.95662e-06	0.00615944	0.833474	Lamp5 Slc35d3_Dlx5
110799	L2/3 IT Macc1	2010111I01Rik-224_ENSMUST00000222929	4.27641e-10	2.60861e-06	0.834214	L2/3 IT Macc1_2010111I01Rik
160294	L6 IT Sulf_3	Cdh13-201_ENSMUST00000117160	1.91528e-07	0.000915888	0.835291	L6 IT Sulf_3_Cdh13
67935	L6 NP Trh	Chn1-208_ENSMUST00000154258	1.1993e-06	0.00443263	0.836946	L6 NP Trh_Chn1
113793	L6b Kcnip1_2	Ifi27-205_ENSMUST00000085065	9.78051e-07	0.00537439	0.838711	L6b Kcnip1_2_Ifi27
46147	L6 CT Gpr139	Cisd3-201_ENSMUST00000107583	6.06764e-08	0.000338332	0.844643	L6 CT Gpr139_Cisd3
281198	Lamp5 Slc35d3	Coq10a-205_ENSMUST00000220027	3.128e-06	0.00984693	0.846462	Lamp5 Slc35d3_Coq10a
302297	L6 CT Nxph2_2	Hnrnpa1-202_ENSMUST00000087351	2.99211e-06	0.00896737	0.846929	L6 CT Nxph2_2_Hnrnpa1
304485	Sst Etv1	Ttc3-212_ENSMUST00000141856	3.11572e-09	1.01354e-05	0.849844	Sst Etv1_Ttc3
304529	Lamp5 Slc35d3	Brwd1-203_ENSMUST00000113827	1.4917e-06	0.00469588	0.851939	Lamp5 Slc35d3_Brwd1
298158	Sst Etv1	Pnpla8-204_ENSMUST00000143771	1.14441e-06	0.00372277	0.853054	Sst Etv1_Pnpla8
27248	L5 NP Slc17a8	Tshz3-201_ENSMUST00000021641	8.42884e-07	0.00312036	0.853162	L5 NP Slc17a8_Tshz3
49551	L6 IT Sulf_1	Homer1-204_ENSMUST00000102752	3.56587e-08	0.000218552	0.854364	L6 IT Sulf_1_Homer1
105263	Sst Chodl	Ppia-203_ENSMUST00000135789	3.42839e-11	1.12897e-07	0.855049	Sst Chodl_Ppia
133066	L6 CT Grp_2	Fundc1-201_ENSMUST00000026016	2.93659e-08	0.000140075	0.855977	L6 CT Grp_2_Fundc1
273520	Lamp5 Slc35d3	Clcn4-201_ENSMUST00000000619	1.66137e-07	0.000522999	0.856712	Lamp5 Slc35d3_Clcn4
287149	Lamp5 Slc35d3	Tmem205-201_ENSMUST00000046831	1.79558e-06	0.00565248	0.856966	Lamp5 Slc35d3_Tmem205
48600	L6 IT Sulf_1	Tspan17-206_ENSMUST00000145574	3.66064e-07	0.0022436	0.862173	L6 IT Sulf_1_Tspan17
111226	Lamp5 Egln3_2	Nr2f1-201_ENSMUST00000091458	8.95471e-07	0.00214465	0.86321	Lamp5 Egln3_2_Nr2f1
55338	L6 CT Gpr139	Tmem191c-202_ENSMUST00000231322	3.93897e-07	0.00219637	0.864234	L6 CT Gpr139_Tmem191c
588514	Vip Serpinf1	Anapc16-204_ENSMUST00000182898	1.22939e-07	0.000321485	0.865063	Vip Serpinf1_Anapc16
617340	Vip Serpinf1	Cyb5a-205_ENSMUST00000163083	1.02707e-06	0.00268578	0.865344	Vip Serpinf1_Cyb5a
37583	Sst C1ql3	Smim4-201_ENSMUST00000049732	2.0593e-06	0.0070531	0.865648	Sst C1ql3_Smim4
61713	L6 IT Sulf_1	Fbxl15-201_ENSMUST00000026256	6.33252e-07	0.0038812	0.866771	L6 IT Sulf_1_Fbxl15
53011	L6 IT Sulf_1	Fam49b-204_ENSMUST00000226675	2.5541e-09	1.56541e-05	0.866849	L6 IT Sulf_1_Fam49b
17830	L6 CT Gpr139	Ccnl2-205_ENSMUST00000139066	3.12809e-07	0.00174422	0.867184	L6 CT Gpr139_Ccnl2
277942	Lamp5 Slc35d3	Caly-201_ENSMUST00000026541	8.11792e-08	0.000255552	0.867376	Lamp5 Slc35d3_Caly
101433	Pvalb Gpr149	Atg4d-203_ENSMUST00000216826	2.16788e-06	0.0086065	0.868359	Pvalb Gpr149_Atg4d
269949	Lamp5 Slc35d3	Dlx6os1-202_ENSMUST00000159827	2.89858e-09	9.12473e-06	0.871047	Lamp5 Slc35d3_Dlx6os1
114669	L2/3 IT Macc1	Oxr1-204_ENSMUST00000110297	4.62047e-07	0.00281849	0.871125	L2/3 IT Macc1_Oxr1
237974	Pvalb Th	Ttc33-203_ENSMUST00000118193	9.33043e-10	2.81219e-06	0.873821	Pvalb Th_Ttc33
33227	L5 NP Slc17a8	Nav3-201_ENSMUST00000032719	3.01421e-07	0.00111586	0.875739	L5 NP Slc17a8_Nav3
326356	L6b Shisa6	Rsrp1-205_ENSMUST00000149003	6.62959e-10	3.55014e-06	0.876013	L6b Shisa6_Rsrp1
51020	L6 IT Sulf_1	Trim9-207_ENSMUST00000221306	3.97795e-07	0.00243809	0.876549	L6 IT Sulf_1_Trim9
111574	Pvalb Gpr149	Map1b-204_ENSMUST00000223820	1.77541e-07	0.000704837	0.878952	Pvalb Gpr149_Map1b
111313	Vip Chat_1	Ccnh-201_ENSMUST00000022030	2.46015e-12	5.06053e-09	0.879734	Vip Chat_1_Ccnh
112637	L6 NP Trh	Snx6-205_ENSMUST00000219302	4.18201e-13	1.54567e-09	0.880879	L6 NP Trh_Snx6
129233	L6 CT Grp_2	Lrp1b-203_ENSMUST00000133104	1.97886e-06	0.00943918	0.882695	L6 CT Grp_2_Lrp1b
272649	Sst Etv1	Gapdh-201_ENSMUST00000073605	2.54939e-07	0.000829316	0.883038	Sst Etv1_Gapdh
35214	L6b Kcnip1_1	Dda1-201_ENSMUST00000098645	4.58991e-07	0.00245652	0.890342	L6b Kcnip1_1_Dda1
221636	L6b Ror1_2	Ndrg4-201_ENSMUST00000041318	2.48914e-10	1.20922e-06	0.891676	L6b Ror1_2_Ndrg4
588531	Vip Serpinf1	Psap-205_ENSMUST00000179238	3.45492e-07	0.000903461	0.893798	Vip Serpinf1_Psap
33538	L6 CT Gpr139	Os9-201_ENSMUST00000080975	3.35708e-07	0.00187191	0.893826	L6 CT Gpr139_Os9
565140	Vip Serpinf1	Blcap-202_ENSMUST00000109528	2.69839e-06	0.00705629	0.895221	Vip Serpinf1_Blcap
152252	Lamp5 Lhx6	Hdgfl3-202_ENSMUST00000107305	6.17494e-07	0.00212109	0.895585	Lamp5 Lhx6_Hdgfl3
573235	Vip Serpinf1	Utp11-201_ENSMUST00000030738	2.70494e-07	0.000707343	0.89583	Vip Serpinf1_Utp11
95300	L6b Kcnip1_2	Llph-202_ENSMUST00000130198	5.42597e-22	2.98157e-18	0.898593	L6b Kcnip1_2_Llph
264395	L6b Rprm	Hmgn2-210_ENSMUST00000137456	1.0678e-17	4.73676e-14	0.900125	L6b Rprm_Hmgn2
97823	Sst Chodl	Ciapin1-201_ENSMUST00000034233	2.04418e-07	0.000673147	0.903044	Sst Chodl_Ciapin1
303240	Sst Etv1	Polr2h-203_ENSMUST00000231392	1.24422e-07	0.000404744	0.905391	Sst Etv1_Polr2h
276660	Lamp5 Slc35d3	Timm10b-208_ENSMUST00000151193	3.77666e-08	0.000118889	0.907443	Lamp5 Slc35d3_Timm10b
157484	L6b Ror1_1	Myl6-206_ENSMUST00000218127	1.68146e-13	7.71959e-10	0.910409	L6b Ror1_1_Myl6
37332	Sst C1ql3	Comtd1-201_ENSMUST00000022295	1.35818e-06	0.00465178	0.912199	Sst C1ql3_Comtd1
60045	Sst C1ql3	Ap3s1-202_ENSMUST00000224622	4.43976e-15	1.52062e-11	0.91389	Sst C1ql3_Ap3s1
90785	Lamp5 Egln3_2	Mrpl48-204_ENSMUST00000132888	2.77655e-06	0.00664985	0.915694	Lamp5 Egln3_2_Mrpl48
334485	Sst Myh8_1	Ing4-203_ENSMUST00000128277	6.84276e-09	1.45956e-05	0.916432	Sst Myh8_1_Ing4
307501	L6b Rprm	Ppp2r2b-201_ENSMUST00000025377	1.14838e-14	5.09421e-11	0.917519	L6b Rprm_Ppp2r2b
184679	L6 CT Grp_2	Prdx5-203_ENSMUST00000149261	9.30814e-12	4.43998e-08	0.920794	L6 CT Grp_2_Prdx5
596627	Vip Serpinf1	Thyn1-203_ENSMUST00000213770	2.10126e-06	0.0054948	0.920852	Vip Serpinf1_Thyn1
579315	Vip Serpinf1	Dlx6os1-201_ENSMUST00000159568	1.87755e-07	0.00049098	0.922072	Vip Serpinf1_Dlx6os1
199914	Pvalb Th	Asph-217_ENSMUST00000146441	2.07354e-06	0.00624965	0.922852	Pvalb Th_Asph
586783	Vip Serpinf1	Cdipt-207_ENSMUST00000206794	6.0839e-07	0.00159094	0.923031	Vip Serpinf1_Cdipt
77780	Pvalb Gpr149	Elavl4-202_ENSMUST00000102723	1.27671e-07	0.000506854	0.928856	Pvalb Gpr149_Elavl4
88325	L6 NP Trh	Rps19-205_ENSMUST00000129847	8.19592e-07	0.00302921	0.931186	L6 NP Trh_Rps19
260607	Pvalb Vipr2	Cept1-203_ENSMUST00000121231	3.64904e-07	0.00128227	0.935943	Pvalb Vipr2_Cept1
233995	Sst Crhr2_2	Cap2-201_ENSMUST00000021802	2.91263e-06	0.00972818	0.935973	Sst Crhr2_2_Cap2
9657	L6b Kcnip1_1	C230004F18Rik-206_ENSMUST00000231449	1.88533e-11	1.00903e-07	0.93636	L6b Kcnip1_1_C230004F18Rik
4741	Lamp5 Egln3_1	Olfm1-203_ENSMUST00000102879	7.00392e-08	0.000140149	0.93644	Lamp5 Egln3_1_Olfm1
594933	Vip Serpinf1	Hnrnpc-201_ENSMUST00000111610	3.41e-06	0.00891715	0.937009	Vip Serpinf1_Hnrnpc
3999	L6 IT Sulf_1	Celf2-215_ENSMUST00000182037	7.5923e-08	0.000465332	0.937166	L6 IT Sulf_1_Celf2
50455	Vip C1ql1	Myt1l-202_ENSMUST00000049784	4.98278e-07	0.000993565	0.937684	Vip C1ql1_Myt1l
244361	Sst Crhr2_2	Rcan2-201_ENSMUST00000044792	1.26063e-12	4.21051e-09	0.939184	Sst Crhr2_2_Rcan2
290948	Pvalb Vipr2	Vstm2a-201_ENSMUST00000109645	8.5388e-07	0.00300054	0.940131	Pvalb Vipr2_Vstm2a
3273	L6 IT Sulf_1	Ncstn-201_ENSMUST00000003550	4.82071e-08	0.000295461	0.942697	L6 IT Sulf_1_Ncstn
147166	Lamp5 Lhx6	Nt5c3-201_ENSMUST00000031793	4.61718e-08	0.0001586	0.945455	Lamp5 Lhx6_Nt5c3
3338	L6 CT Gpr139	Cadm3-202_ENSMUST00000111220	1.50516e-06	0.00839275	0.947763	L6 CT Gpr139_Cadm3
601842	Vip Serpinf1	Slc25a11-201_ENSMUST00000014750	3.55688e-06	0.00930125	0.950424	Vip Serpinf1_Slc25a11
20468	L6 CT Gpr139	Svop-201_ENSMUST00000058472	1.88149e-07	0.00104912	0.951067	L6 CT Gpr139_Svop
358568	Vip Gpc3	Brd9-206_ENSMUST00000222399	2.72048e-08	4.59488e-05	0.951485	Vip Gpc3_Brd9
605893	Vip Serpinf1	Mterf3-210_ENSMUST00000174011	4.20494e-08	0.000109959	0.951695	Vip Serpinf1_Mterf3
21553	Sst C1ql3	Srrm3-204_ENSMUST00000144211	1.62529e-09	5.56662e-06	0.952213	Sst C1ql3_Srrm3
578158	Vip Serpinf1	Psph-201_ENSMUST00000031399	1.05556e-06	0.00276028	0.95278	Vip Serpinf1_Psph
45345	L5 NP Slc17a8	Coro6-204_ENSMUST00000102493	4.66931e-07	0.00172858	0.953872	L5 NP Slc17a8_Coro6
575581	Vip Serpinf1	Ppp1cb-201_ENSMUST00000015100	9.62068e-09	2.51581e-05	0.954265	Vip Serpinf1_Ppp1cb
52844	Sst C1ql3	Ebag9-203_ENSMUST00000227691	6.89947e-07	0.00236307	0.95476	Sst C1ql3_Ebag9
91756	Sst Chodl	Ino80e-203_ENSMUST00000106343	2.74221e-06	0.00903011	0.955026	Sst Chodl_Ino80e
43831	Sst C1ql3	Gabrg2-202_ENSMUST00000070735	9.63462e-09	3.29986e-05	0.957578	Sst C1ql3_Gabrg2
7646	Sst C1ql3	Snap25-202_ENSMUST00000110098	1.07088e-06	0.00366776	0.959257	Sst C1ql3_Snap25
586497	Vip Serpinf1	Dctn5-201_ENSMUST00000033156	1.21691e-07	0.000318222	0.961661	Vip Serpinf1_Dctn5
586480	Vip Serpinf1	Ubfd1-201_ENSMUST00000033158	6.82957e-07	0.00178593	0.962069	Vip Serpinf1_Ubfd1
37334	Sst C1ql3	Comtd1-204_ENSMUST00000177527	1.15958e-07	0.000397157	0.964347	Sst C1ql3_Comtd1
241919	Sst Crhr2_2	Lsamp-207_ENSMUST00000189229	5.2332e-07	0.00174789	0.965434	Sst Crhr2_2_Lsamp
24607	L6 CT Gpr139	Creld1-201_ENSMUST00000032422	2.69962e-08	0.000150531	0.96567	L6 CT Gpr139_Creld1
268102	Pvalb Vipr2	Cit-201_ENSMUST00000051704	1.82723e-06	0.00642089	0.965922	Pvalb Vipr2_Cit
75644	Sncg Slc17a8	H2afz-207_ENSMUST00000174561	4.83781e-07	0.00260419	0.966049	Sncg Slc17a8_H2afz
101645	Sst Chodl	Thyn1-201_ENSMUST00000039161	2.84714e-06	0.00937563	0.966181	Sst Chodl_Thyn1
601397	Vip Serpinf1	Ncor1-212_ENSMUST00000155486	1.4985e-16	3.91858e-13	0.968984	Vip Serpinf1_Ncor1
44376	L6 CT Gpr139	Nt5m-201_ENSMUST00000102695	8.47373e-08	0.000472495	0.970247	L6 CT Gpr139_Nt5m
589251	Vip Serpinf1	Abhd17a-201_ENSMUST00000003436	1.48077e-06	0.00387221	0.973498	Vip Serpinf1_Abhd17a
168486	L6 CT Grp_2	Trappc1-202_ENSMUST00000102601	2.21351e-07	0.00105584	0.974274	L6 CT Grp_2_Trappc1
25775	Sst C1ql3	Tsen34-201_ENSMUST00000038521	1.24373e-11	4.25976e-08	0.974741	Sst C1ql3_Tsen34
499722	Vip Lmo1	Olfm1-205_ENSMUST00000152415	8.06819e-11	1.37079e-07	0.975344	Vip Lmo1_Olfm1
30422	L5 NP Slc17a8	Adgra1-201_ENSMUST00000026548	4.29601e-09	1.59038e-05	0.981318	L5 NP Slc17a8_Adgra1
293796	Lamp5 Slc35d3	Eif1-203_ENSMUST00000139846	5.24684e-07	0.0016517	0.983297	Lamp5 Slc35d3_Eif1
153391	Sst Crhr2_1	Prkcb-202_ENSMUST00000064989	9.90557e-07	0.00352638	0.986025	Sst Crhr2_1_Prkcb
249483	Sst Etv1	Dtymk-202_ENSMUST00000112890	4.98862e-10	1.6228e-06	0.987565	Sst Etv1_Dtymk
45660	L6 IT Sulf_1	Dusp14-205_ENSMUST00000164891	6.42114e-07	0.00393551	0.988852	L6 IT Sulf_1_Dusp14
20150	L5 NP Slc17a8	Evi5-201_ENSMUST00000112642	1.65161e-07	0.000611424	0.989074	L5 NP Slc17a8_Evi5
266672	Lamp5 Slc35d3	Kcnip4-201_ENSMUST00000087395	1.48285e-06	0.00466803	0.98958	Lamp5 Slc35d3_Kcnip4
1620	L6 IT Sulf_1	Mff-205_ENSMUST00000160632	1.67923e-12	1.0292e-08	0.990969	L6 IT Sulf_1_Mff
112191	Pvalb Gpr149	Odc1-201_ENSMUST00000171737	1.05996e-08	4.20803e-05	0.992479	Pvalb Gpr149_Odc1
8094	L2/3 IT Cdh13 Sla	Trpc4ap-205_ENSMUST00000140370	1.45642e-11	7.77581e-08	0.992778	L2/3 IT Cdh13 Sla_Trpc4ap
606075	Vip Serpinf1	Exoc3-201_ENSMUST00000035934	2.23439e-09	5.84294e-06	0.99648	Vip Serpinf1_Exoc3
101530	Sst Chodl	Tmem205-201_ENSMUST00000046831	8.24548e-08	0.000271524	0.9983	Sst Chodl_Tmem205
284094	Lamp5 Slc35d3	6430548M08Rik-201_ENSMUST00000034281	1.3821e-07	0.000435085	0.998986	Lamp5 Slc35d3_6430548M08Rik
427131	Sst Myh8_2	Fgf12-201_ENSMUST00000100024	4.67427e-07	0.00125785	0.999593	Sst Myh8_2_Fgf12
66258	L6b Kcnip1_2	Nsmf-210_ENSMUST00000134744	5.51255e-08	0.000302915	1.00019	L6b Kcnip1_2_Nsmf
17406	L6 CT Gpr139	Fbxo44-208_ENSMUST00000167160	7.74578e-08	0.000431905	1.00134	L6 CT Gpr139_Fbxo44
618305	Vip Serpinf1	March5-201_ENSMUST00000024078	4.90885e-07	0.00128366	1.00184	Vip Serpinf1_March5
592687	Vip Serpinf1	Aktip-205_ENSMUST00000125257	1.50728e-06	0.00394154	1.0033	Vip Serpinf1_Aktip
221688	Pvalb Th	Cdh11-202_ENSMUST00000210425	2.05657e-07	0.000619849	1.00401	Pvalb Th_Cdh11
607932	Vip Serpinf1	Jkamp-202_ENSMUST00000117449	1.06341e-06	0.00278081	1.00427	Vip Serpinf1_Jkamp
71410	L6b Kcnip1_2	Zdhhc9-201_ENSMUST00000037960	5.77047e-07	0.00317087	1.00441	L6b Kcnip1_2_Zdhhc9
606605	Vip Serpinf1	Ak6-201_ENSMUST00000022135	6.16979e-07	0.0016134	1.00531	Vip Serpinf1_Ak6
80943	Pvalb Gpr149	Rab28-203_ENSMUST00000201422	1.06894e-12	4.24368e-09	1.00565	Pvalb Gpr149_Rab28
77927	Pvalb Gpr149	Mmachc-201_ENSMUST00000030453	7.73028e-07	0.00306892	1.00697	Pvalb Gpr149_Mmachc
308496	Lamp5 Slc35d3	Slc3a2-201_ENSMUST00000010239	1.0979e-08	3.45619e-05	1.0163	Lamp5 Slc35d3_Slc3a2
7581	L6 IT Sulf_1	Gpcpd1-202_ENSMUST00000060955	2.66026e-08	0.000163048	1.0185	L6 IT Sulf_1_Gpcpd1
101301	Sncg Slc17a8	Chordc1-208_ENSMUST00000217031	1.22696e-07	0.000660474	1.01923	Sncg Slc17a8_Chordc1
61319	L6b Kcnip1_1	Cdc37l1-201_ENSMUST00000050148	9.63686e-07	0.00515765	1.01942	L6b Kcnip1_1_Cdc37l1
33221	L6 CT Gpr139	Syt1-202_ENSMUST00000105276	1.12631e-07	0.000628031	1.02224	L6 CT Gpr139_Syt1
153395	Sst Crhr2_1	Prkcb-208_ENSMUST00000206495	1.92476e-09	6.85215e-06	1.02489	Sst Crhr2_1_Prkcb
157005	Lamp5 Lhx6	Nap1l1-205_ENSMUST00000219143	2.13551e-07	0.000733548	1.02821	Lamp5 Lhx6_Nap1l1
48655	L6 CT Gpr139	Dbn1-201_ENSMUST00000021950	3.04788e-07	0.0016995	1.02929	L6 CT Gpr139_Dbn1
248747	Pvalb Vipr2	Erbb4-202_ENSMUST00000121473	2.54476e-06	0.00894227	1.03035	Pvalb Vipr2_Erbb4
150878	Lamp5 Lhx6	Uba2-201_ENSMUST00000102746	4.39728e-10	1.51047e-06	1.03134	Lamp5 Lhx6_Uba2
362231	Vip Gpc3	Csmd3-205_ENSMUST00000160716	5.69332e-06	0.00961601	1.03206	Vip Gpc3_Csmd3
98483	Vip Chat_1	Gse1-201_ENSMUST00000034279	4.72382e-06	0.00971691	1.03324	Vip Chat_1_Gse1
131392	Sst Crhr2_1	Snap25-202_ENSMUST00000110098	3.76924e-10	1.34185e-06	1.03743	Sst Crhr2_1_Snap25
139540	Lamp5 Lhx6	Scp2-201_ENSMUST00000030340	2.41707e-06	0.00830264	1.03903	Lamp5 Lhx6_Scp2
179494	Lamp5 Lhx6	Polr2h-203_ENSMUST00000231392	1.12362e-06	0.00385963	1.03921	Lamp5 Lhx6_Polr2h
577485	Vip Serpinf1	Suds3-201_ENSMUST00000086471	1.89438e-06	0.0049538	1.04087	Vip Serpinf1_Suds3
617162	Vip Serpinf1	Tcf4-204_ENSMUST00000114978	2.27678e-07	0.000595378	1.04644	Vip Serpinf1_Tcf4
590116	Vip Serpinf1	Nap1l1-205_ENSMUST00000219143	1.08074e-06	0.00282613	1.04702	Vip Serpinf1_Nap1l1
85406	L6 IT Sulf_2	Gadd45a-201_ENSMUST00000043098	1.20642e-06	0.00630352	1.04722	L6 IT Sulf_2_Gadd45a
80970	L6b Kcnip1_2	Fbxl5-201_ENSMUST00000047857	1.06004e-10	5.82493e-07	1.04958	L6b Kcnip1_2_Fbxl5
89939	L6b Kcnip1_2	A230006K03Rik-201_ENSMUST00000107533	4.29429e-07	0.00235971	1.05089	L6b Kcnip1_2_A230006K03Rik
32001	L6 CT Gpr139	Ddt-201_ENSMUST00000001716	1.36759e-06	0.00762567	1.05531	L6 CT Gpr139_Ddt
79054	Sncg Slc17a8	Mul1-201_ENSMUST00000044058	1.97185e-08	0.000106145	1.05748	Sncg Slc17a8_Mul1
598239	Vip Serpinf1	Tmod2-208_ENSMUST00000215614	1.16434e-07	0.000304474	1.06053	Vip Serpinf1_Tmod2
92902	Pvalb Gpr149	Ccdc28a-202_ENSMUST00000080860	2.00532e-06	0.00796111	1.06095	Pvalb Gpr149_Ccdc28a
13152	L6 CT Gpr139	Slc6a17-206_ENSMUST00000168211	1.29267e-06	0.00720795	1.06712	L6 CT Gpr139_Slc6a17
76719	Vip Chat_1	Creb3-201_ENSMUST00000102944	2.38433e-06	0.00490456	1.06745	Vip Chat_1_Creb3
84929	Vip Chat_1	Dennd2a-201_ENSMUST00000036877	6.335e-07	0.00130311	1.06896	Vip Chat_1_Dennd2a
106613	Sst Chodl	Trappc1-202_ENSMUST00000102601	2.50978e-08	8.26472e-05	1.07014	Sst Chodl_Trappc1
7612	Sst C1ql3	Plcb1-202_ENSMUST00000110116	4.99394e-07	0.00171042	1.0706	Sst C1ql3_Plcb1
115438	L6b Kcnip1_2	Kctd17-210_ENSMUST00000229290	7.12189e-07	0.00391348	1.07546	L6b Kcnip1_2_Kctd17
85223	L6 IT Sulf_2	Jazf1-201_ENSMUST00000074541	2.63985e-09	1.37932e-05	1.07855	L6 IT Sulf_2_Jazf1
607603	Vip Serpinf1	Npas3-201_ENSMUST00000101432	6.52135e-09	1.70533e-05	1.08385	Vip Serpinf1_Npas3
53158	L6 IT Sulf_1	Ly6e-212_ENSMUST00000190810	1.37664e-08	8.43744e-05	1.08486	L6 IT Sulf_1_Ly6e
599415	Vip Serpinf1	Map4-206_ENSMUST00000169851	3.97949e-08	0.000104064	1.08587	Vip Serpinf1_Map4
612382	Vip Serpinf1	Tango2-201_ENSMUST00000115628	1.98095e-06	0.00518017	1.09056	Vip Serpinf1_Tango2
77851	L6b Kcnip1_2	Uqcrh-204_ENSMUST00000134760	2.46738e-07	0.00135582	1.09609	L6b Kcnip1_2_Uqcrh
174495	Lamp5 Lhx6	Sptssa-201_ENSMUST00000056228	2.79295e-06	0.00959377	1.09848	Lamp5 Lhx6_Sptssa
383127	Vip Htr1f	Serpini1-201_ENSMUST00000029423	5.89587e-06	0.0088438	1.09903	Vip Htr1f_Serpini1
293393	L6 CT Nxph2_2	Hlf-201_ENSMUST00000004051	6.40301e-10	1.91898e-06	1.10438	L6 CT Nxph2_2_Hlf
346487	Vip Gpc3	Thrb-202_ENSMUST00000022304	1.32208e-06	0.00223299	1.10549	Vip Gpc3_Thrb
66453	Sncg Slc17a8	Dnlz-201_ENSMUST00000028295	4.39691e-07	0.00236686	1.10819	Sncg Slc17a8_Dnlz
34774	Sst C1ql3	BC030500-201_ENSMUST00000062978	1.05432e-06	0.00361106	1.11705	Sst C1ql3_BC030500
588604	Vip Serpinf1	Kif1bp-201_ENSMUST00000065887	7.79942e-07	0.00203955	1.11841	Vip Serpinf1_Kif1bp
161827	Lamp5 Lhx6	Hnrnpc-206_ENSMUST00000227458	1.20187e-07	0.000412841	1.12056	Lamp5 Lhx6_Hnrnpc
33738	L6b Kcnip1_1	Myl6-206_ENSMUST00000218127	1.66712e-14	8.92242e-11	1.12812	L6b Kcnip1_1_Myl6
8293	Sst C1ql3	Ctnnbl1-201_ENSMUST00000029178	2.10254e-06	0.00720119	1.13368	Sst C1ql3_Ctnnbl1
64630	Sncg Slc17a8	Glul-201_ENSMUST00000086199	3.19514e-07	0.00171995	1.13979	Sncg Slc17a8_Glul
72593	Sst Chodl	Tspyl2-201_ENSMUST00000044509	2.74353e-06	0.00903446	1.14291	Sst Chodl_Tspyl2
616013	Vip Serpinf1	Rab12-205_ENSMUST00000167962	9.25661e-07	0.0024206	1.14518	Vip Serpinf1_Rab12
607615	Vip Serpinf1	Snx6-201_ENSMUST00000005798	1.56144e-06	0.00408317	1.1461	Vip Serpinf1_Snx6
41327	L6 IT Sulf_1	Arpp19-209_ENSMUST00000169492	2.84835e-09	1.74575e-05	1.14709	L6 IT Sulf_1_Arpp19
307211	Pvalb Vipr2	Celf4-202_ENSMUST00000115816	5.24413e-08	0.000184279	1.15061	Pvalb Vipr2_Celf4
603525	Vip Serpinf1	Nmt1-201_ENSMUST00000021314	7.50911e-09	1.96363e-05	1.15541	Vip Serpinf1_Nmt1
250623	L6 CT Nxph2_2	Pbx1-205_ENSMUST00000176540	3.37754e-07	0.00101225	1.15601	L6 CT Nxph2_2_Pbx1
561597	Vip Serpinf1	Olfm1-202_ENSMUST00000100244	1.73234e-15	4.53007e-12	1.15716	Vip Serpinf1_Olfm1
229877	Sst Crhr2_2	Gria1-201_ENSMUST00000036315	2.38156e-11	7.95442e-08	1.15745	Sst Crhr2_2_Gria1
59457	L5 NP Slc17a8	Gm47283-204_ENSMUST00000179483	1.37828e-06	0.0051024	1.15822	L5 NP Slc17a8_Gm47283
560570	Vip Serpinf1	Smyd2-201_ENSMUST00000027897	5.28735e-07	0.00138264	1.15982	Vip Serpinf1_Smyd2
596285	Vip Serpinf1	Chordc1-208_ENSMUST00000217031	1.36259e-07	0.000356318	1.16302	Vip Serpinf1_Chordc1
244814	Pvalb Th	Dlgap1-211_ENSMUST00000148486	3.79315e-08	0.000114326	1.16374	Pvalb Th_Dlgap1
580659	Vip Serpinf1	Dctn1-203_ENSMUST00000113913	2.9107e-06	0.00761149	1.1672	Vip Serpinf1_Dctn1
109223	Sst Chodl	Gaa-203_ENSMUST00000106259	2.24458e-06	0.00739139	1.16723	Sst Chodl_Gaa
39004	L5 NP Slc17a8	Pcdh9-204_ENSMUST00000193901	1.26408e-09	4.67962e-06	1.16847	L5 NP Slc17a8_Pcdh9
63775	Pvalb Gpr149	Cops9-204_ENSMUST00000148508	5.97197e-12	2.37087e-08	1.17185	Pvalb Gpr149_Cops9
114354	Sncg Slc17a8	Drosha-201_ENSMUST00000090292	1.92151e-07	0.00103435	1.17558	Sncg Slc17a8_Drosha
10004	Sst C1ql3	Tmem47-201_ENSMUST00000026760	2.47333e-08	8.47117e-05	1.18027	Sst C1ql3_Tmem47
595536	Vip Serpinf1	Trim35-201_ENSMUST00000022623	3.98021e-07	0.00104082	1.18336	Vip Serpinf1_Trim35
263399	Pvalb Vipr2	Elavl4-202_ENSMUST00000102723	9.5359e-07	0.00335092	1.1835	Pvalb Vipr2_Elavl4
375979	Sst Myh8_2	Olfm1-203_ENSMUST00000102879	3.44793e-16	9.27839e-13	1.18638	Sst Myh8_2_Olfm1
612093	Vip Serpinf1	Dnm1l-202_ENSMUST00000096229	2.21243e-07	0.000578551	1.19041	Vip Serpinf1_Dnm1l
1615	Sst C1ql3	Mff-209_ENSMUST00000160972	7.67507e-08	0.000262871	1.19628	Sst C1ql3_Mff
37375	L6 IT Sulf_1	Rps24-205_ENSMUST00000223999	1.06663e-12	6.53736e-09	1.19657	L6 IT Sulf_1_Rps24
57028	L6 CT Gpr139	Kcnj6-201_ENSMUST00000095873	2.55224e-08	0.000142313	1.20072	L6 CT Gpr139_Kcnj6
260213	Pvalb Vipr2	Ensa-202_ENSMUST00000058230	9.20819e-07	0.00323576	1.20434	Pvalb Vipr2_Ensa
440757	Vip Igfbp6	Snap25-202_ENSMUST00000110098	2.63481e-11	2.93782e-08	1.20559	Vip Igfbp6_Snap25
581540	Vip Serpinf1	Syn2-201_ENSMUST00000009538	4.6375e-08	0.000121271	1.20614	Vip Serpinf1_Syn2
571752	Vip Serpinf1	Clta-204_ENSMUST00000107849	9.79348e-08	0.000256099	1.20893	Vip Serpinf1_Clta
253500	Lamp5 Slc35d3	Rapgef4-201_ENSMUST00000028525	2.93418e-13	9.23681e-10	1.21166	Lamp5 Slc35d3_Rapgef4
118850	Sst Chodl	Pigp-203_ENSMUST00000113910	4.08633e-07	0.00134563	1.21422	Sst Chodl_Pigp
121882	L6b Kcnip1_2	Ppp2r2b-201_ENSMUST00000025377	2.16697e-08	0.000119075	1.21574	L6b Kcnip1_2_Ppp2r2b
124380	Sst Crhr2_1	Pantr1-209_ENSMUST00000181725	2.42097e-07	0.000861864	1.2169	Sst Crhr2_1_Pantr1
69519	L6 IT Sulf_2	Snap25-202_ENSMUST00000110098	2.97723e-19	1.5556e-15	1.21921	L6 IT Sulf_2_Snap25
17407	L6 CT Gpr139	Fbxo44-201_ENSMUST00000057907	1.08491e-07	0.000604948	1.22718	L6 CT Gpr139_Fbxo44
94165	Sst Chodl	Gpx4-207_ENSMUST00000183037	5.31922e-11	1.75162e-07	1.23286	Sst Chodl_Gpx4
396358	Sst Myh8_2	Ing4-203_ENSMUST00000128277	1.9772e-07	0.000532065	1.23519	Sst Myh8_2_Ing4
562779	Vip Serpinf1	Gorasp2-201_ENSMUST00000028509	1.33989e-06	0.0035038	1.24967	Vip Serpinf1_Gorasp2
9060	L6 CT Gpr139	Tcea2-206_ENSMUST00000129686	5.76559e-07	0.00321489	1.25685	L6 CT Gpr139_Tcea2
66611	L6 NP Trh	Olfm1-205_ENSMUST00000152415	1.23578e-28	4.56746e-25	1.26204	L6 NP Trh_Olfm1
283561	Pvalb Vipr2	Cdh11-202_ENSMUST00000210425	1.97141e-08	6.92755e-05	1.2638	Pvalb Vipr2_Cdh11
571478	Vip Serpinf1	Smu1-201_ENSMUST00000030117	7.99514e-08	0.000209073	1.27153	Vip Serpinf1_Smu1
1614	L6b Kcnip1_1	Mff-212_ENSMUST00000162003	1.25716e-06	0.00672834	1.28112	L6b Kcnip1_1_Mff
103402	Vip Chat_1	Hmgn3-203_ENSMUST00000185315	2.7594e-08	5.67609e-05	1.28124	Vip Chat_1_Hmgn3
242062	Pvalb Th	Ift57-204_ENSMUST00000142682	3.33157e-07	0.00100414	1.28247	Pvalb Th_Ift57
84338	Sncg Slc17a8	Dlx5-201_ENSMUST00000052609	1.04602e-06	0.00563075	1.29484	Sncg Slc17a8_Dlx5
592662	Vip Serpinf1	Chd9-206_ENSMUST00000209474	1.06523e-07	0.000278558	1.29588	Vip Serpinf1_Chd9
85938	Sncg Slc17a8	Nfu1-203_ENSMUST00000120240	1.01197e-13	5.44742e-10	1.29735	Sncg Slc17a8_Nfu1
110340	Sncg Slc17a8	Iars-201_ENSMUST00000047363	2.0901e-07	0.0011251	1.29762	Sncg Slc17a8_Iars
54991	L2/3 IT Cdh13 Sla	Rbfox1-205_ENSMUST00000230658	4.66214e-20	2.48912e-16	1.30839	L2/3 IT Cdh13 Sla_Rbfox1
296203	Pvalb Vipr2	H2afy-201_ENSMUST00000016081	2.07751e-08	7.30037e-05	1.30868	Pvalb Vipr2_H2afy
9065	L6 CT Gpr139	Tcea2-208_ENSMUST00000136145	3.36012e-07	0.0018736	1.3087	L6 CT Gpr139_Tcea2
58981	Sst C1ql3	Satb1-213_ENSMUST00000169480	2.30024e-07	0.000787831	1.315	Sst C1ql3_Satb1
119944	Sst Chodl	Mtch1-203_ENSMUST00000127423	2.9861e-07	0.000983323	1.32656	Sst Chodl_Mtch1
274192	L6 CT Nxph2_2	Psmc4-205_ENSMUST00000138512	5.94722e-07	0.00178238	1.32744	L6 CT Nxph2_2_Psmc4
287289	Pvalb Vipr2	Opcml-203_ENSMUST00000123779	5.56499e-07	0.00195554	1.33479	Pvalb Vipr2_Opcml
121973	Sncg Slc17a8	Dctn4-204_ENSMUST00000223984	1.65379e-07	0.000890234	1.33706	Sncg Slc17a8_Dctn4
307797	Pvalb Vipr2	Tcf4-204_ENSMUST00000114978	9.27275e-07	0.00325845	1.33852	Pvalb Vipr2_Tcf4
83139	L6b Kcnip1_2	Ran-202_ENSMUST00000111343	1.80439e-07	0.000991515	1.33998	L6b Kcnip1_2_Ran
71530	L6b Kcnip1_2	C230004F18Rik-206_ENSMUST00000231449	1.92748e-09	1.05915e-05	1.3422	L6b Kcnip1_2_C230004F18Rik
581898	Vip Serpinf1	Eno2-201_ENSMUST00000004378	3.10688e-09	8.12449e-06	1.34849	Vip Serpinf1_Eno2
267207	Pvalb Vipr2	Epha5-204_ENSMUST00000113401	2.24014e-06	0.00787186	1.36139	Pvalb Vipr2_Epha5
77332	L6b Kcnip1_2	Elavl2-207_ENSMUST00000107118	2.75758e-07	0.00151529	1.3642	L6b Kcnip1_2_Elavl2
112500	L6b Kcnip1_2	Arl4a-205_ENSMUST00000146905	7.50076e-07	0.00412167	1.36572	L6b Kcnip1_2_Arl4a
6572	L5 NP Slc17a8	Lrrc4c-201_ENSMUST00000059049	1.39246e-12	5.15487e-09	1.37158	L5 NP Slc17a8_Lrrc4c
118120	Sncg Slc17a8	Fstl1-201_ENSMUST00000114763	1.43163e-09	7.70646e-06	1.38408	Sncg Slc17a8_Fstl1
79282	Sncg Slc17a8	Fbxo44-202_ENSMUST00000105705	3.9024e-07	0.00210066	1.39622	Sncg Slc17a8_Fbxo44
63221	Sncg Slc17a8	Bcs1l-202_ENSMUST00000113732	7.93001e-07	0.00426872	1.39882	Sncg Slc17a8_Bcs1l
163541	Lamp5 Lhx6	Opcml-202_ENSMUST00000115243	5.57046e-10	1.91345e-06	1.40046	Lamp5 Lhx6_Opcml
124261	Lamp5 Lhx6	Unc50-201_ENSMUST00000027285	2.88377e-09	9.90576e-06	1.4041	Lamp5 Lhx6_Unc50
176907	L6 CT Grp_2	Ly6e-213_ENSMUST00000191127	3.37076e-07	0.00160785	1.40451	L6 CT Grp_2_Ly6e
176406	Lamp5 Lhx6	Polr2k-201_ENSMUST00000057177	2.10602e-08	7.23416e-05	1.40648	Lamp5 Lhx6_Polr2k
100202	Sst Chodl	Psme2-201_ENSMUST00000111378	2.54715e-06	0.00838775	1.40979	Sst Chodl_Psme2
114533	Vip Chat_1	Polr2k-201_ENSMUST00000057177	1.23758e-06	0.00254571	1.41993	Vip Chat_1_Polr2k
23383	Lamp5 Egln3_1	Ggct-201_ENSMUST00000002874	4.31115e-06	0.00862662	1.42275	Lamp5 Egln3_1_Ggct
113010	Sst Chodl	Dbpht2-202_ENSMUST00000221311	1.14054e-06	0.00375579	1.4276	Sst Chodl_Dbpht2
77865	L6b Kcnip1_2	Pomgnt1-204_ENSMUST00000120083	4.69206e-07	0.00257829	1.42818	L6b Kcnip1_2_Pomgnt1
603161	Vip Serpinf1	Eif1-203_ENSMUST00000139846	1.64906e-08	4.3123e-05	1.43207	Vip Serpinf1_Eif1
5835	Sst C1ql3	Scn1a-206_ENSMUST00000138910	7.41612e-10	2.54002e-06	1.4324	Sst C1ql3_Scn1a
108197	Sncg Slc17a8	Nt5c3b-201_ENSMUST00000092688	4.6817e-07	0.00252016	1.4335	Sncg Slc17a8_Nt5c3b
616544	Vip Serpinf1	Mapre2-201_ENSMUST00000025127	1.15224e-08	3.01312e-05	1.43809	Vip Serpinf1_Mapre2
91427	L6b Kcnip1_2	Lyrm1-207_ENSMUST00000208202	1.0947e-08	6.01535e-05	1.44279	L6b Kcnip1_2_Lyrm1
118621	Sncg Slc17a8	Cct8-203_ENSMUST00000175977	3.81168e-07	0.00205183	1.44693	Sncg Slc17a8_Cct8
379963	Vip Htr1f	Gnas-221_ENSMUST00000156623	3.33069e-06	0.00499603	1.45133	Vip Htr1f_Gnas
99656	Sncg Slc17a8	Fam213a-202_ENSMUST00000118466	4.59785e-07	0.00247502	1.45243	Sncg Slc17a8_Fam213a
123074	Sncg Slc17a8	D030056L22Rik-202_ENSMUST00000062753	9.82747e-07	0.00529013	1.4598	Sncg Slc17a8_D030056L22Rik
7646	Vip C1ql1	Snap25-202_ENSMUST00000110098	6.35698e-25	1.26758e-21	1.46243	Vip C1ql1_Snap25
90229	Sncg Slc17a8	Ngrn-201_ENSMUST00000117989	5.27965e-07	0.00284203	1.46702	Sncg Slc17a8_Ngrn
98399	Sncg Slc17a8	Cmc2-201_ENSMUST00000078589	1.39321e-06	0.00749967	1.46927	Sncg Slc17a8_Cmc2
83962	Sncg Slc17a8	Ccz1-201_ENSMUST00000031621	1.4228e-07	0.000765894	1.47583	Sncg Slc17a8_Ccz1
99169	Vip Chat_1	Adk-201_ENSMUST00000045376	2.08237e-06	0.00428343	1.47725	Vip Chat_1_Adk
99430	Sncg Slc17a8	Gnl3-201_ENSMUST00000037739	1.66451e-06	0.00896005	1.4936	Sncg Slc17a8_Gnl3
70695	Sncg Slc17a8	Gm14418-201_ENSMUST00000108955	6.89015e-08	0.000370897	1.50165	Sncg Slc17a8_Gm14418
80004	Sncg Slc17a8	Pclo-201_ENSMUST00000030691	4.43857e-08	0.000238928	1.50217	Sncg Slc17a8_Pclo
567257	Vip Serpinf1	Hnrnph2-202_ENSMUST00000059297	2.50272e-09	6.54462e-06	1.51156	Vip Serpinf1_Hnrnph2
68466	L6b Kcnip1_2	Pamr1-201_ENSMUST00000028612	2.02021e-07	0.00111011	1.51485	L6b Kcnip1_2_Pamr1
93475	Vip Chat_1	Pkib-201_ENSMUST00000066028	1.16379e-06	0.00239391	1.52358	Vip Chat_1_Pkib
253480	Pvalb Vipr2	Dlx1-206_ENSMUST00000172629	1.78274e-07	0.000626456	1.52424	Pvalb Vipr2_Dlx1
31171	Lamp5 Egln3_1	Akap7-203_ENSMUST00000100012	8.27768e-07	0.00165636	1.53587	Lamp5 Egln3_1_Akap7
101644	Sncg Slc17a8	Thyn1-202_ENSMUST00000213683	6.43478e-08	0.000346384	1.54155	Sncg Slc17a8_Thyn1
71805	Sncg Slc17a8	G6pdx-201_ENSMUST00000004327	7.51954e-08	0.000404777	1.54916	Sncg Slc17a8_G6pdx
118347	Sncg Slc17a8	Alcam-201_ENSMUST00000023312	3.9085e-07	0.00210395	1.55251	Sncg Slc17a8_Alcam
62988	Sncg Slc17a8	Ndufs1-201_ENSMUST00000027111	3.41696e-09	1.83935e-05	1.55257	Sncg Slc17a8_Ndufs1
88004	Sncg Slc17a8	Nop53-202_ENSMUST00000197477	1.72634e-06	0.0092929	1.55557	Sncg Slc17a8_Nop53
114484	Vip Chat_1	Laptm4b-201_ENSMUST00000022867	2.15434e-06	0.00443148	1.55959	Vip Chat_1_Laptm4b
120779	Sncg Slc17a8	Mrps10-203_ENSMUST00000119945	1.04279e-06	0.00561332	1.56645	Sncg Slc17a8_Mrps10
107586	Sncg Slc17a8	Usp32-202_ENSMUST00000108075	6.76114e-08	0.000363952	1.57222	Sncg Slc17a8_Usp32
97209	Sncg Slc17a8	Sin3b-202_ENSMUST00000109950	3.89898e-07	0.00209882	1.57867	Sncg Slc17a8_Sin3b
118564	L6b Kcnip1_2	Ncam2-202_ENSMUST00000067602	3.41701e-09	1.87765e-05	1.59081	L6b Kcnip1_2_Ncam2
17669	L6 CT Gpr139	Ajap1-201_ENSMUST00000105646	1.55819e-06	0.00868845	1.60986	L6 CT Gpr139_Ajap1
121632	L6b Kcnip1_2	Stard4-201_ENSMUST00000025236	3.75907e-09	2.06561e-05	1.61488	L6b Kcnip1_2_Stard4
96959	Sst Chodl	Isyna1-201_ENSMUST00000019283	6.52221e-07	0.00214777	1.62597	Sst Chodl_Isyna1
99892	Sncg Slc17a8	Tmem55b-209_ENSMUST00000162957	3.33116e-08	0.000179316	1.65229	Sncg Slc17a8_Tmem55b
69636	Sncg Slc17a8	Naa20-201_ENSMUST00000002805	1.7024e-06	0.00916401	1.65365	Sncg Slc17a8_Naa20
85624	Sncg Slc17a8	Aup1-208_ENSMUST00000204343	3.09019e-08	0.000166345	1.65708	Sncg Slc17a8_Aup1
78505	Sncg Slc17a8	Tmem234-201_ENSMUST00000102591	1.34041e-08	7.21543e-05	1.67301	Sncg Slc17a8_Tmem234
592767	Vip Serpinf1	Cpne2-201_ENSMUST00000048653	1.83359e-09	4.79485e-06	1.67655	Vip Serpinf1_Cpne2
113407	Sncg Slc17a8	Dlst-201_ENSMUST00000053811	2.87159e-07	0.00154578	1.67711	Sncg Slc17a8_Dlst
53161	L6 CT Gpr139	Ly6e-213_ENSMUST00000191127	1.4208e-22	7.92235e-19	1.6808	L6 CT Gpr139_Ly6e
85023	Sncg Slc17a8	Cntnap2-201_ENSMUST00000060839	2.68688e-09	1.44635e-05	1.68089	Sncg Slc17a8_Cntnap2
74670	Sncg Slc17a8	Plekho1-202_ENSMUST00000123006	6.24467e-08	0.000336151	1.68183	Sncg Slc17a8_Plekho1
121908	Sncg Slc17a8	Kcnn2-208_ENSMUST00000211323	1.02004e-07	0.000549089	1.70092	Sncg Slc17a8_Kcnn2
74532	Sncg Slc17a8	Scnm1-202_ENSMUST00000173462	3.41739e-09	1.83958e-05	1.7015	Sncg Slc17a8_Scnm1
133384	Lamp5 Lhx6	Fgf13-203_ENSMUST00000119833	2.70524e-09	9.29248e-06	1.71818	Lamp5 Lhx6_Fgf13
553726	Vip Lmo1	Rcan2-201_ENSMUST00000044792	1.94969e-11	3.31252e-08	1.72945	Vip Lmo1_Rcan2
277914	Pvalb Vipr2	Adgra1-201_ENSMUST00000026548	3.8226e-09	1.34326e-05	1.75574	Pvalb Vipr2_Adgra1
71972	Sncg Slc17a8	Las1l-201_ENSMUST00000079987	5.50274e-09	2.96213e-05	1.76285	Sncg Slc17a8_Las1l
77669	Sncg Slc17a8	Scp2-203_ENSMUST00000122878	1.81323e-07	0.000976064	1.76977	Sncg Slc17a8_Scp2
109721	Sncg Slc17a8	Tbce-201_ENSMUST00000039894	1.26089e-10	6.78737e-07	1.7776	Sncg Slc17a8_Tbce
73821	L6b Kcnip1_2	Glrb-204_ENSMUST00000135043	1.084e-06	0.00595657	1.79001	L6b Kcnip1_2_Glrb
97377	Sncg Slc17a8	Ddx39-201_ENSMUST00000019576	1.3473e-07	0.000725254	1.80323	Sncg Slc17a8_Ddx39
89804	L6b Kcnip1_2	Ptpn5-201_ENSMUST00000033142	1.82152e-08	0.000100092	1.80374	L6b Kcnip1_2_Ptpn5
70861	Sncg Slc17a8	Arfrp1-212_ENSMUST00000185118	1.45521e-10	7.83339e-07	1.80697	Sncg Slc17a8_Arfrp1
255138	L6 CT Nxph2_2	Snap25-202_ENSMUST00000110098	6.91995e-08	0.000207391	1.80996	L6 CT Nxph2_2_Snap25
78308	Sncg Slc17a8	Lsm10-203_ENSMUST00000179323	9.02234e-10	4.85673e-06	1.81736	Sncg Slc17a8_Lsm10
99844	Sncg Slc17a8	Slc35f4-201_ENSMUST00000074368	1.23246e-07	0.000663434	1.8206	Sncg Slc17a8_Slc35f4
66325	Sncg Slc17a8	Uap1l1-202_ENSMUST00000131025	1.50552e-06	0.0081042	1.84665	Sncg Slc17a8_Uap1l1
157624	L6b Ror1_1	Stxbp2-207_ENSMUST00000160708	3.39786e-45	1.55996e-41	1.85244	L6b Ror1_1_Stxbp2
90611	L6b Kcnip1_2	Aamdc-206_ENSMUST00000136757	2.80473e-08	0.00015412	1.86783	L6b Kcnip1_2_Aamdc
174156	Lamp5 Lhx6	Id2-203_ENSMUST00000222667	7.54948e-12	2.59325e-08	1.92531	Lamp5 Lhx6_Id2
94597	Sncg Slc17a8	1190007I07Rik-201_ENSMUST00000079648	1.1516e-06	0.00619906	1.92611	Sncg Slc17a8_1190007I07Rik
119947	Sst Chodl	Mtch1-207_ENSMUST00000153658	2.79145e-06	0.00919225	1.95019	Sst Chodl_Mtch1
108913	Sncg Slc17a8	Atp5h-203_ENSMUST00000106537	2.21777e-07	0.00119383	1.95196	Sncg Slc17a8_Atp5h
81439	L6b Kcnip1_2	Usp46-204_ENSMUST00000145016	1.09188e-06	0.00599986	1.96103	L6b Kcnip1_2_Usp46
106248	Sncg Slc17a8	Nt5m-203_ENSMUST00000149076	1.44252e-07	0.000776506	1.98851	Sncg Slc17a8_Nt5m
108542	Sncg Slc17a8	Nmt1-203_ENSMUST00000148795	1.25633e-07	0.000676283	2.00696	Sncg Slc17a8_Nmt1
182931	Lamp5 Lhx6	Dlgap1-207_ENSMUST00000133983	8.4947e-08	0.000291793	2.0346	Lamp5 Lhx6_Dlgap1
64435	Sncg Slc17a8	2310009B15Rik-202_ENSMUST00000193374	2.39463e-07	0.00128903	2.03645	Sncg Slc17a8_2310009B15Rik
83345	Sncg Slc17a8	Abhd11-201_ENSMUST00000046999	1.89628e-08	0.000102077	2.11623	Sncg Slc17a8_Abhd11
109690	Sncg Slc17a8	Gpr137b-201_ENSMUST00000021738	1.11174e-06	0.00598447	2.1243	Sncg Slc17a8_Gpr137b
115099	Sncg Slc17a8	Tsta3-204_ENSMUST00000229641	5.39984e-09	2.90673e-05	2.14882	Sncg Slc17a8_Tsta3
73869	L6b Kcnip1_2	Trim2-206_ENSMUST00000107695	3.79768e-07	0.00208683	2.18617	L6b Kcnip1_2_Trim2
129905	Lamp5 Lhx6	Zfp385b-211_ENSMUST00000171063	2.41147e-11	8.28341e-08	2.19804	Lamp5 Lhx6_Zfp385b
84761	Sncg Slc17a8	Chchd3-201_ENSMUST00000066379	6.44444e-09	3.46904e-05	2.20219	Sncg Slc17a8_Chchd3
89025	L6b Kcnip1_2	Gpi1-211_ENSMUST00000206603	5.97253e-10	3.28191e-06	2.22426	L6b Kcnip1_2_Gpi1
101366	Sncg Slc17a8	Ubl5-203_ENSMUST00000160124	3.0411e-08	0.000163703	2.23141	Sncg Slc17a8_Ubl5
87095	Sncg Slc17a8	9330179D12Rik-201_ENSMUST00000180569	1.05378e-06	0.0056725	2.29327	Sncg Slc17a8_9330179D12Rik
54996	L6 IT Sulf_1	Rbfox1-208_ENSMUST00000231194	1.804e-25	1.10567e-21	2.36057	L6 IT Sulf_1_Rbfox1
287305	L6 CT Nxph2_2	Ntm-209_ENSMUST00000151977	2.40782e-07	0.000721624	2.54155	L6 CT Nxph2_2_Ntm
84594	Sncg Slc17a8	Impdh1-209_ENSMUST00000162242	9.37485e-08	0.000504648	2.65715	Sncg Slc17a8_Impdh1
393690	Sst Myh8_2	Dync1i1-206_ENSMUST00000203520	4.0469e-21	1.08902e-17	2.67499	Sst Myh8_2_Dync1i1
75956	L6b Kcnip1_2	St6galnac5-201_ENSMUST00000044278	8.52668e-07	0.00468541	2.68449	L6b Kcnip1_2_St6galnac5
118796	Sncg Slc17a8	Atp5o-206_ENSMUST00000155452	6.01467e-09	3.2377e-05	2.69355	Sncg Slc17a8_Atp5o
116507	L6b Kcnip1_2	Krt80-205_ENSMUST00000230909	6.4883e-07	0.00356532	2.8745	L6b Kcnip1_2_Krt80
116269	Sncg Slc17a8	Cacnb3-202_ENSMUST00000109150	1.91314e-08	0.000102984	2.95097	Sncg Slc17a8_Cacnb3
255138	Pvalb Vipr2	Snap25-202_ENSMUST00000110098	1.54105e-17	5.41525e-14	3.57294	Pvalb Vipr2_Snap25
98111	L6b Kcnip1_2	Nrn1l-201_ENSMUST00000060167	1.20735e-06	0.00663437	4.01019	L6b Kcnip1_2_Nrn1l
